# Supplementary material for: Exploration of catecholase-like activity of a series of magnetically coupled transition metal complexes of Mn, Co and Ni: new insights into the solution state behavior of Mn complexes
Source: Royal Society of Chemistry journal article supplement (doi:10.1039/c9dt02399b), 2019-01-01
Supplement: c9dt02399b1.pdf [file c9dt02399b1.pdf]

## Exploration of catecholase-like activity of a series of magnetically coupled transition metal complexes of Mn, Co and Ni: new insights into solution state behavior of Mn complex

Abani Sarkar,<sup>a</sup> Aratrika Chakraborty,<sup>a</sup> Amit Adhikary,<sup>a</sup> Suwendu Maity,<sup>b</sup> Arnab Mandal,<sup>a</sup> Debabrata Samanta,<sup>c</sup> Prasanta Ghosh,<sup>b</sup> and Debasis Das\*<sup>a</sup>

<sup>a</sup>Department of Chemistry, University College of Science, University of Calcutta, 92 A. P. C. Road, Kolkata 700009, India

<sup>b</sup>Department of Chemistry, R. K. Mission Residential College, Narendrapur, Kolkata 700 103, India

<sup>c</sup>Department of Chemistry, Indian Institute of Technology, Kanpur, Kanpur-208016, India

### Index

| Sl. No. | Contents                                                                                                  | Page No. |
|---------|-----------------------------------------------------------------------------------------------------------|----------|
| 1.      | FTIR –Plot (Figure S1-S3)                                                                                 | S1-S2    |
| 2.      | UV-Vis spectral study                                                                                     | S3       |
| 3.      | ESI-MS mass spectra study                                                                                 | S3-S5    |
| 4.      | Time dependent ESI-MS mass spectra study in presence of 3,5 DTBC                                          | S5-S7    |
| 5.      | Crystallographic Data and Processing Parameters of Complexes <b>1-3</b>                                   | S8       |
| 6.      | Selected bond length (Å) and bond angles (°) of Complex <b>1-3</b> .                                      | S9-S11   |
| 7.      | PXRD patterns of Complex <b>1, 2</b> and <b>3</b> .                                                       | S12      |
| 8.      | Kinetic study                                                                                             | S13      |
| 9.      | Measurement of Conductance of complexes <b>1-3</b> and the only acetate salt of Mn, Co, and Ni with time. | S14      |
| 10.     | Catalytic Cycle of Catechol Oxidation by complex <b>2</b> and <b>3</b> .                                  | S15-S17  |
| 11.     | UV-Vis spectra of the reaction mixture of 3,5 DTBC and complex <b>1,2</b> and <b>3</b> and KI.            | S17      |
| 12.     | Experimental and simulated EPR data of all complexes <b>1-3</b> .                                         | S17      |
| 13.     | Coordinates and Energies of the Optimized Structures (DFT)                                                | S18-S33  |

## 1. FT-IR plot

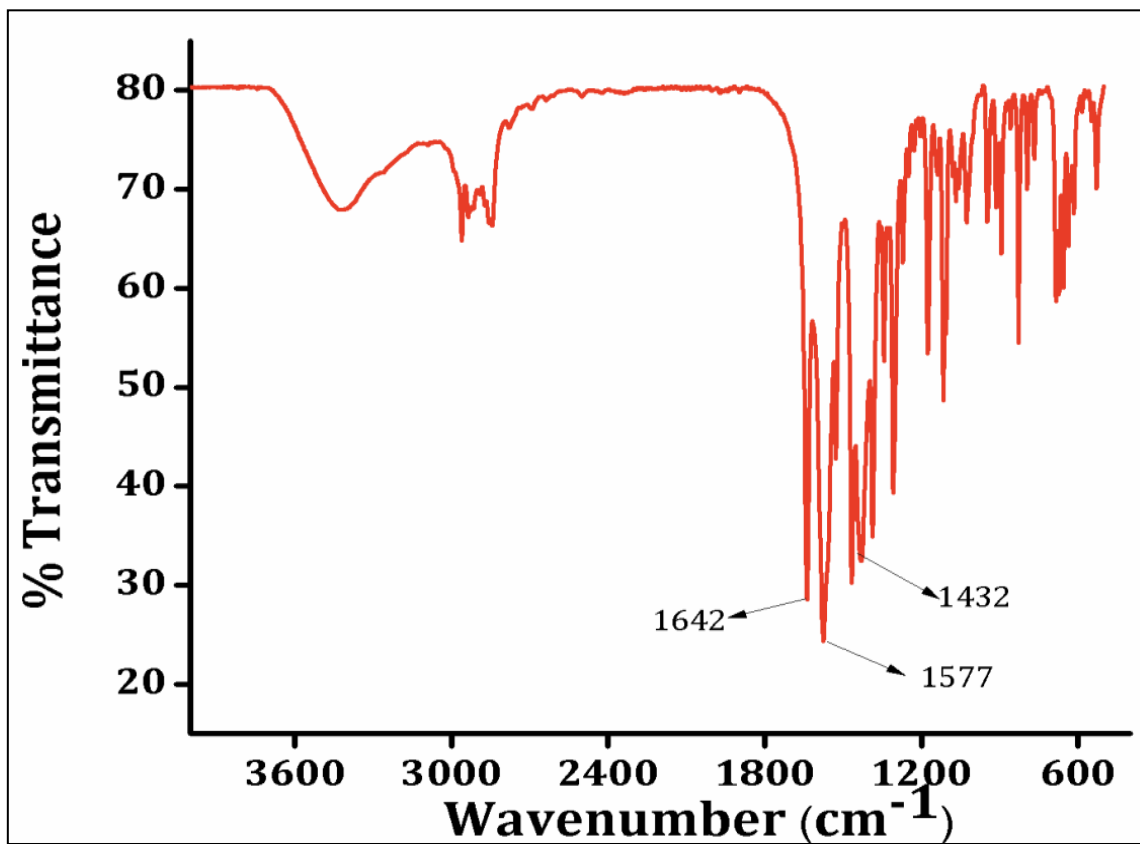

Fig. S1 FT-IR spectrum of complex 1.

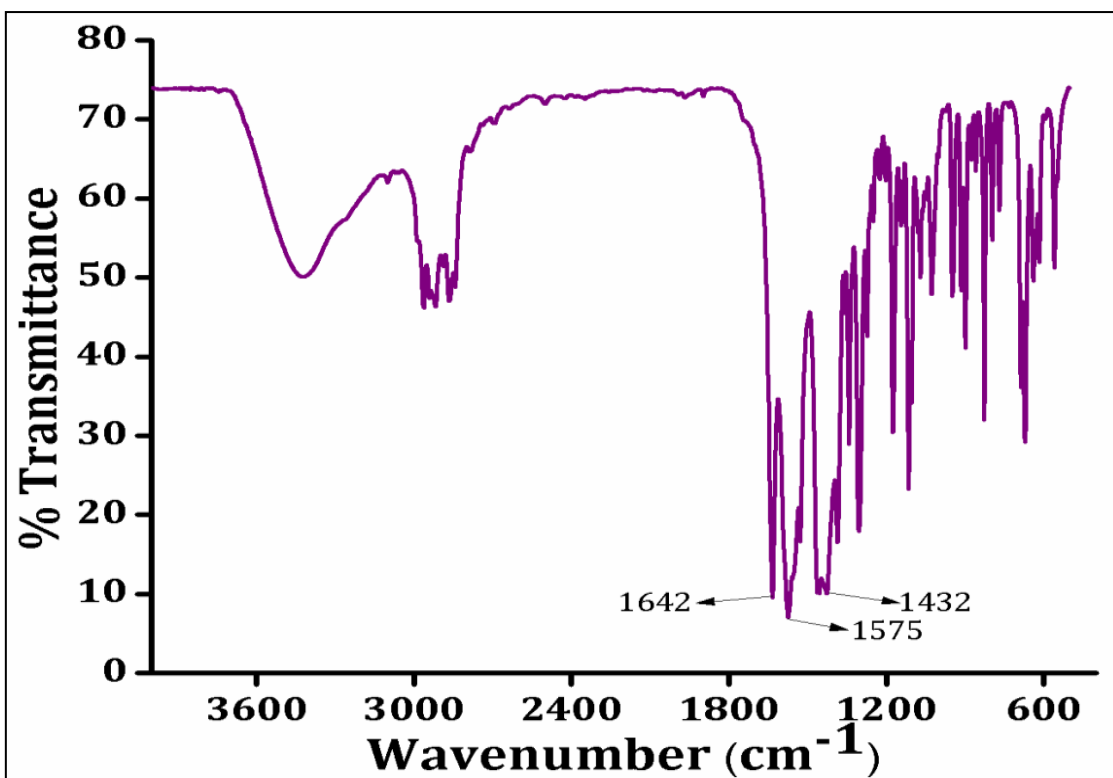

Fig. S2 FT-IR spectrum of complex 2.

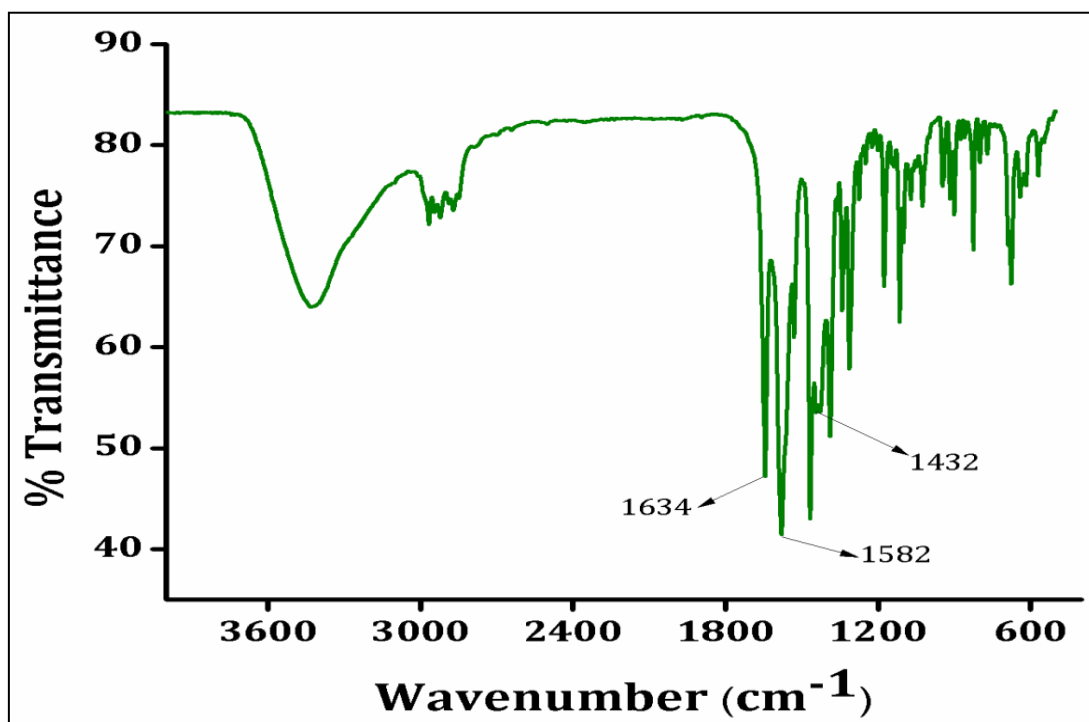

Fig. S3 FT-IR spectrum of complex 3.

## 2. UV-Vis spectral study

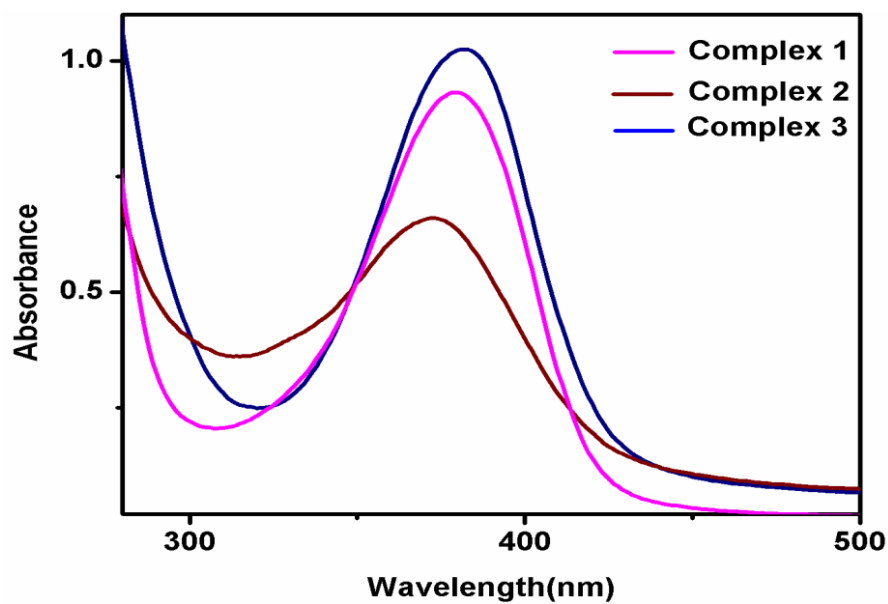

Fig. S4 UV-Vis spectra of complex 1 complex 2 and complex 3.

## 3. ESI-MS mass spectra study

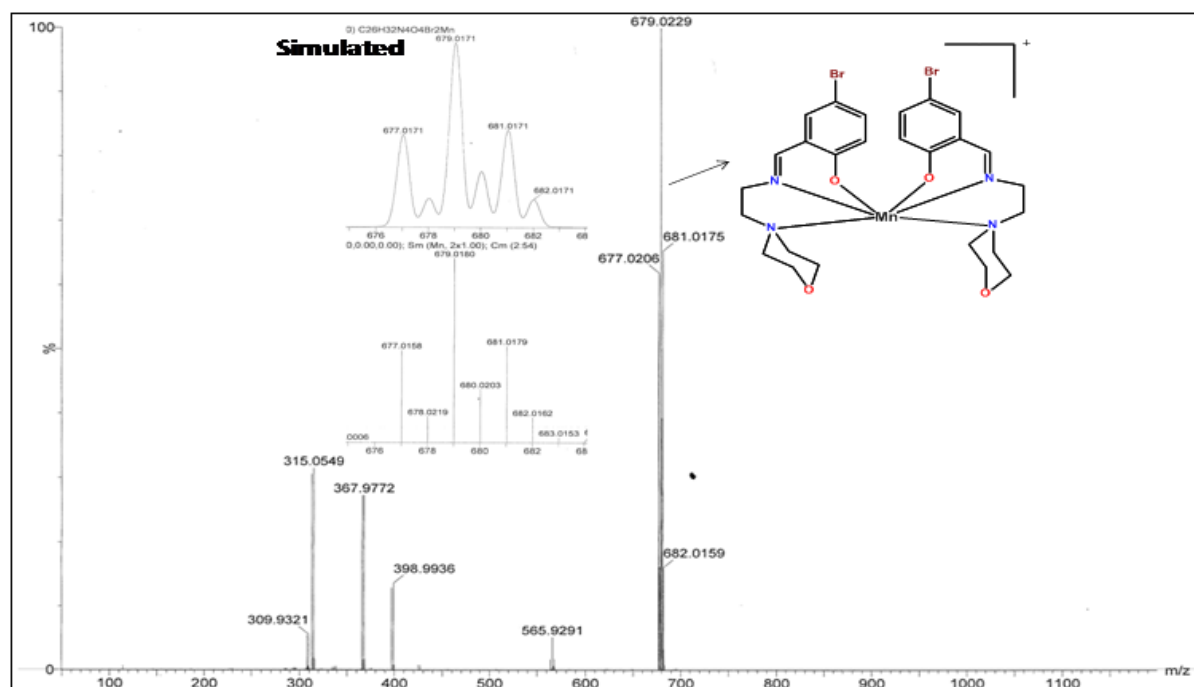

Fig. S5 ESI-MS spectra of complex 1

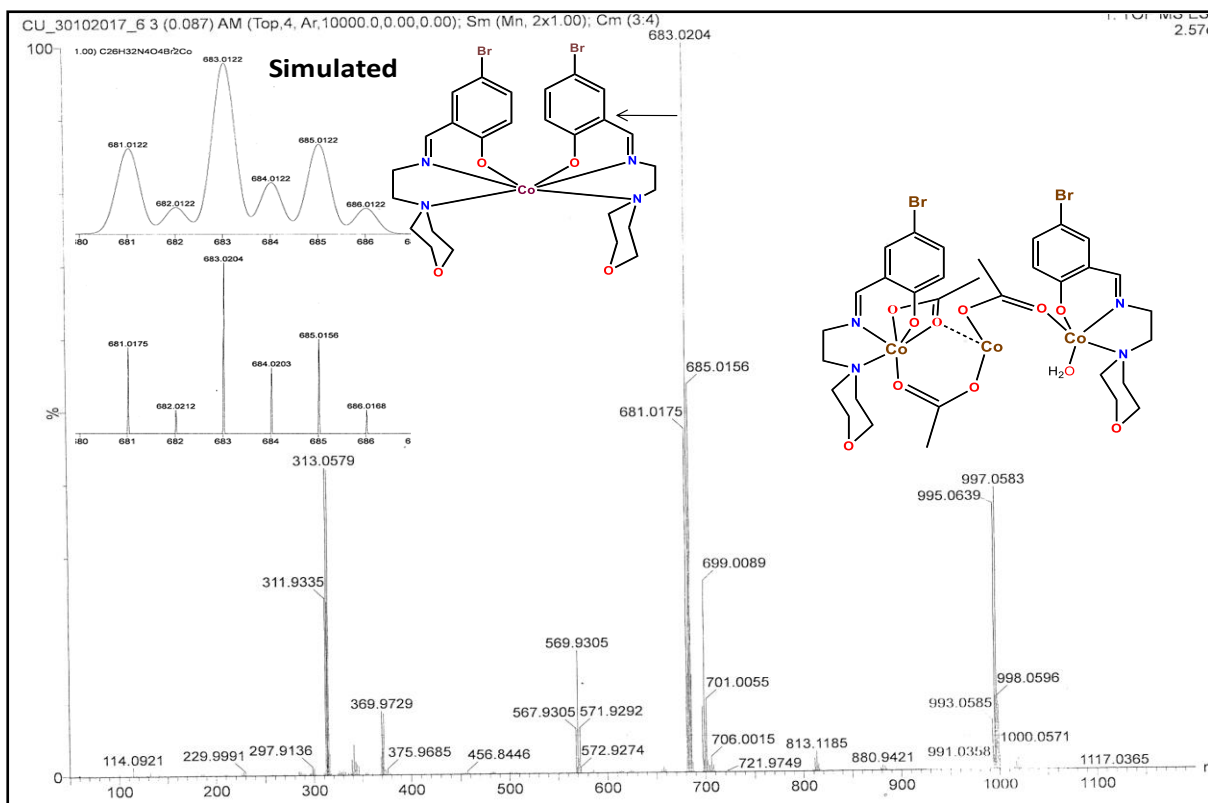

**Fig. S6** ESI-MS spectra of complex 2.

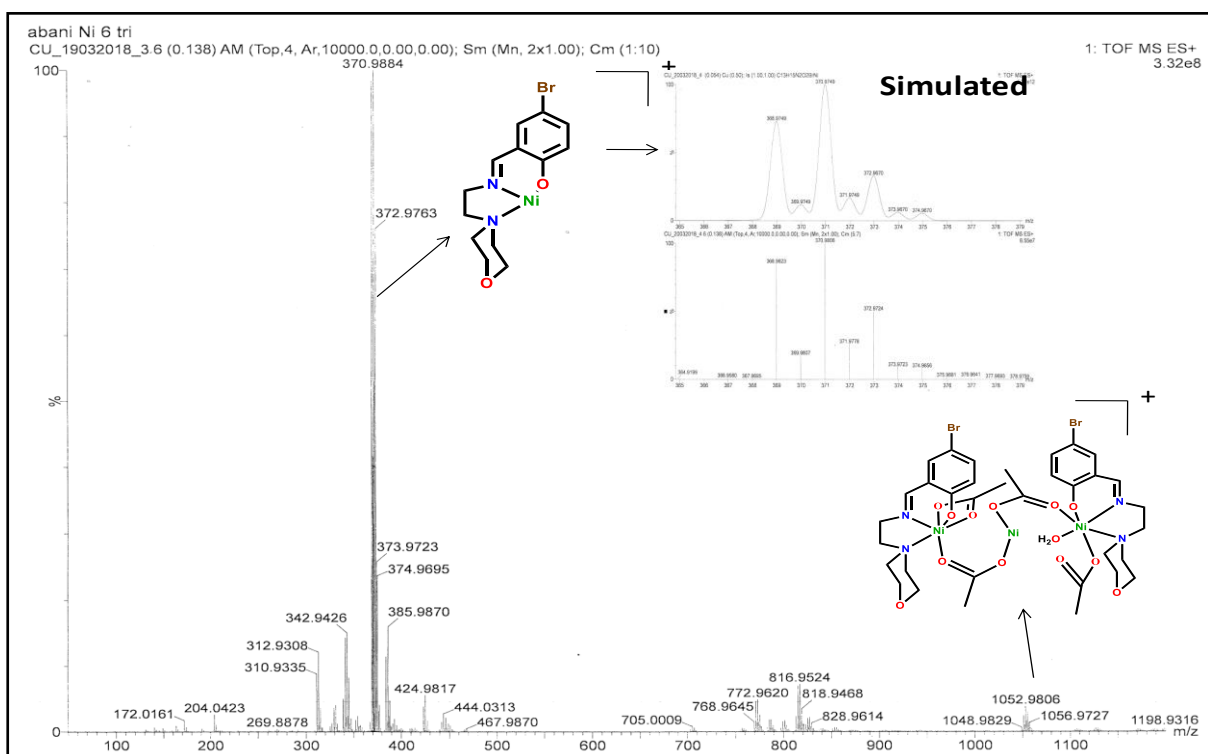

**Fig. S7** ESI-MS spectra of complex 3.



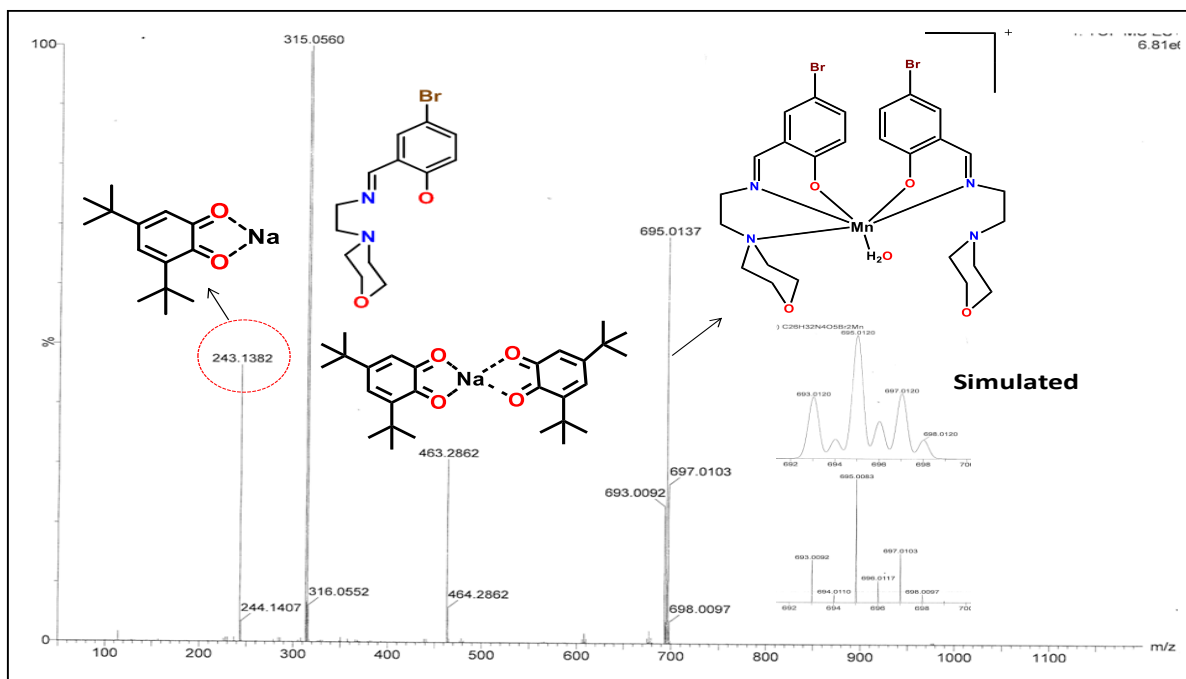

**Fig. S9** ESI-MS spectra of complex **1** in presence of 3,5 DTBC at time 30 minutes.

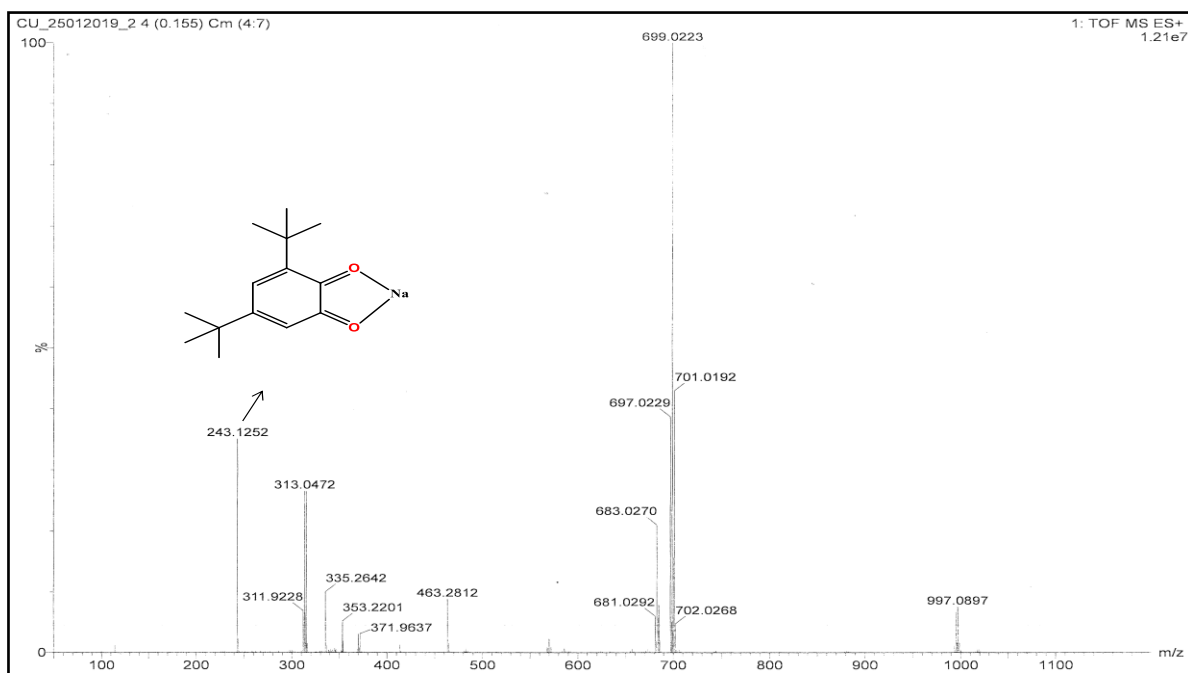

**Fig. S10** ESI-MS spectra of complex **2** in presence of 3,5 DTBC at time 10 minutes.

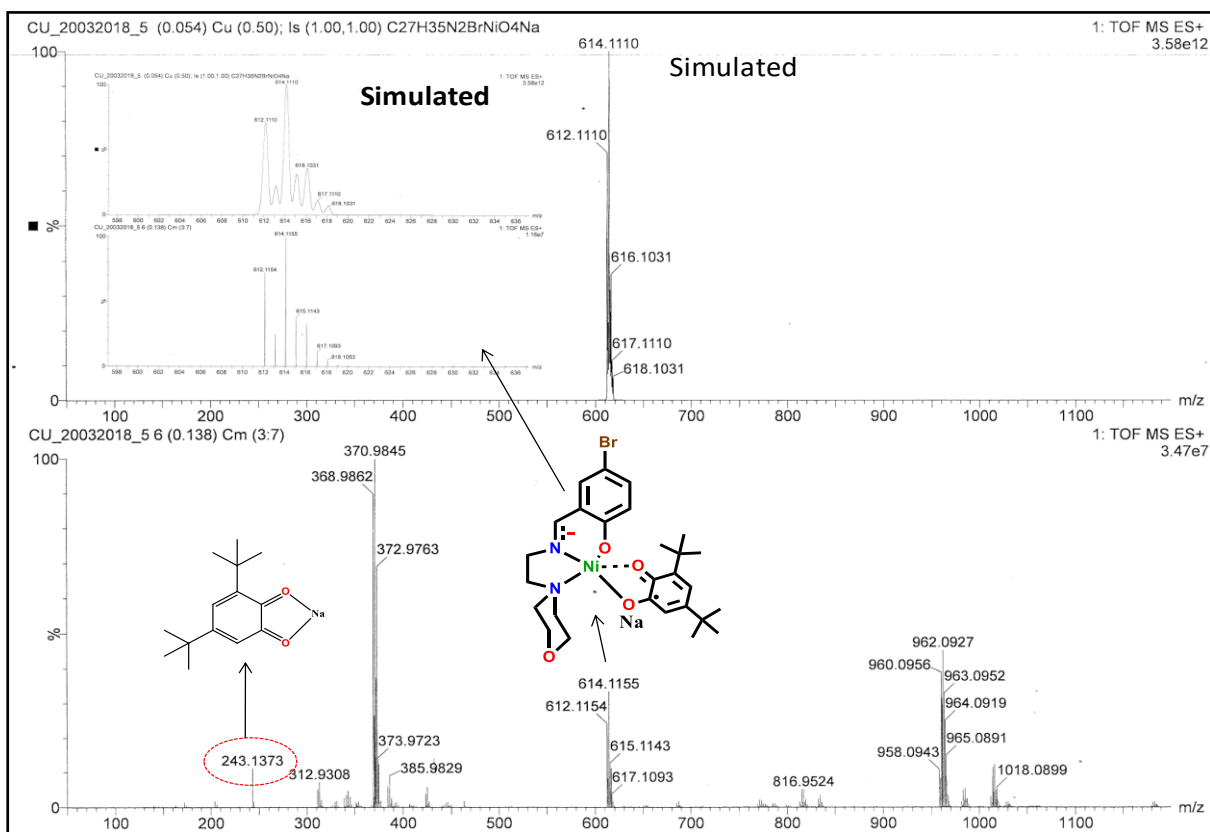

**Fig. S11** ESI-MS spectra of complex **3** in presence of 3,5 DTBC at time 10 minutes.

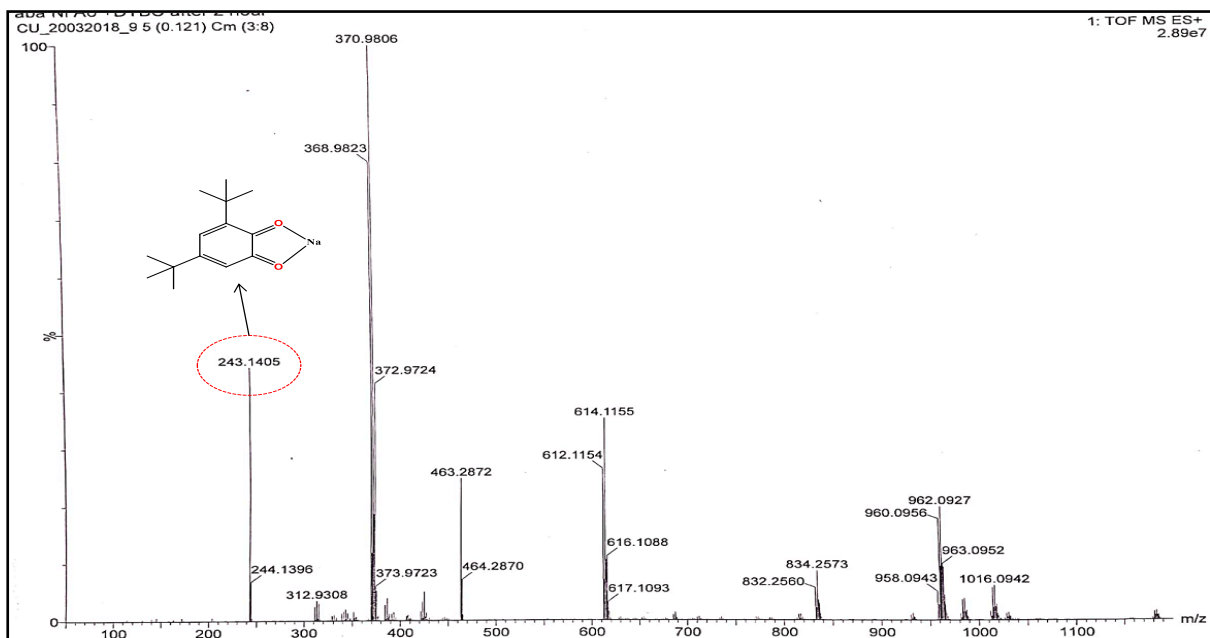

**Fig. S12** ESI-MS spectra of complex **3** in presence of 3,5 DTBC at time 60 minutes.



**Table 1** Crystallographic Data and Processing Parameters of Complexes **1-3**

|                                                                                                                                                                                                                                                                                  | 1                                                                                              | 2                                                                                              | 3                                                                                              |
|----------------------------------------------------------------------------------------------------------------------------------------------------------------------------------------------------------------------------------------------------------------------------------|------------------------------------------------------------------------------------------------|------------------------------------------------------------------------------------------------|------------------------------------------------------------------------------------------------|
| Formula                                                                                                                                                                                                                                                                          | C <sub>34</sub> H <sub>44</sub> Br <sub>2</sub> Mn <sub>3</sub> N <sub>4</sub> O <sub>12</sub> | C <sub>34</sub> H <sub>44</sub> Br <sub>2</sub> Co <sub>3</sub> N <sub>4</sub> O <sub>12</sub> | C <sub>34</sub> H <sub>42</sub> Br <sub>2</sub> N <sub>4</sub> Ni <sub>3</sub> O <sub>12</sub> |
| mol wt.                                                                                                                                                                                                                                                                          | 1025.35                                                                                        | 1037.34                                                                                        | 1034.59                                                                                        |
| cryst color                                                                                                                                                                                                                                                                      | Light yellow                                                                                   | Brown                                                                                          | Green                                                                                          |
| cryst system                                                                                                                                                                                                                                                                     | Monoclinic                                                                                     | Monoclinic                                                                                     | Monoclinic                                                                                     |
| space group                                                                                                                                                                                                                                                                      | P2 <sub>1/n</sub> (No. 14)                                                                     | P2 <sub>1/c</sub> (No. 14)                                                                     | P2 <sub>1/c</sub> (No. 4)                                                                      |
| <i>a</i> (Å)                                                                                                                                                                                                                                                                     | 11.784(2)                                                                                      | 11.4288(16)                                                                                    | 11.1778(13)                                                                                    |
| <i>b</i> (Å)                                                                                                                                                                                                                                                                     | 9.5219(17)                                                                                     | 9.4698(13)                                                                                     | 9.5533(11)                                                                                     |
| <i>c</i> (Å)                                                                                                                                                                                                                                                                     | 19.786(4)                                                                                      | 19.605(3)                                                                                      | 19.611(2)                                                                                      |
| $\alpha$ (°)                                                                                                                                                                                                                                                                     | 90                                                                                             | 90                                                                                             | 90                                                                                             |
| $\beta$ (°)                                                                                                                                                                                                                                                                      | 107.025(6)                                                                                     | 105.643(3)                                                                                     | 103.854(7)                                                                                     |
| $\gamma$ (°)                                                                                                                                                                                                                                                                     | 90                                                                                             | 90                                                                                             | 90                                                                                             |
| <i>V</i> (Å <sup>3</sup> )                                                                                                                                                                                                                                                       | 2122.8(7)                                                                                      | 2043.2(5)                                                                                      | 2033.2(4)                                                                                      |
| <i>Z</i>                                                                                                                                                                                                                                                                         | 2                                                                                              | 2                                                                                              | 2                                                                                              |
| <i>T</i> (K)                                                                                                                                                                                                                                                                     | 296                                                                                            | 291                                                                                            | 300 K                                                                                          |
| $\rho_{\text{calcd}}$ (g cm <sup>-3</sup> )                                                                                                                                                                                                                                      | 1.604                                                                                          | 1.686                                                                                          | 1.693                                                                                          |
| Unique refl.                                                                                                                                                                                                                                                                     | 2153                                                                                           | 2518                                                                                           | 1800                                                                                           |
| reflection [ <i>I</i> >2 $\sigma$ ( <i>I</i> )]                                                                                                                                                                                                                                  | 3635                                                                                           | 3884                                                                                           | 3571                                                                                           |
| $\mu$ (mm <sup>-1</sup> )                                                                                                                                                                                                                                                        | 2.821                                                                                          | 3.222                                                                                          | 3.403                                                                                          |
| $\lambda$ (Å)                                                                                                                                                                                                                                                                    | 0.71073                                                                                        | 0.71073                                                                                        | 0.71073                                                                                        |
| F(000)                                                                                                                                                                                                                                                                           | 1034                                                                                           | 1046                                                                                           | 1052                                                                                           |
| R <sub>1</sub> <sup>a</sup> /GOF <sup>b</sup>                                                                                                                                                                                                                                    | 0.0678/1.04                                                                                    | 0.0538/1.03                                                                                    | 00.0832/1.041                                                                                  |
| wR <sub>2</sub> <sup>c</sup> [ <i>I</i> >2 $\sigma$ ( <i>I</i> )]                                                                                                                                                                                                                | 0.1661                                                                                         | 0.1219                                                                                         | 0.1773                                                                                         |
| residual density (eÅ <sup>-3</sup> )                                                                                                                                                                                                                                             | -0.35, 0.60                                                                                    | -0.47, 0.59                                                                                    | -0.61, 0.69                                                                                    |
| CCDC No.                                                                                                                                                                                                                                                                         | 1889042                                                                                        | 1889043                                                                                        | 1889359                                                                                        |
| <sup>a</sup> R1 = $\Sigma F_o  -  F_c /\Sigma F_o $ , <sup>b</sup> GOF = $\{\Sigma[w(F_o^2 - F_c^2)^2]/(n-p)\}^{1/2}$ .<br><sup>c</sup> wR2 = $\{\Sigma[w(F_o^2 - F_c^2)^2]/\Sigma[w(F_o^2)^2]\}^{1/2}$ where $w = 1/[\sigma^2(F_o^2) + (aP)^2 + bP]$ , $P = (F_o^2 + 2F_c^2)/3$ |                                                                                                |                                                                                                |                                                                                                |

**5. Table S1.** Selected bond length (Å) and bond angles (°) of Complex 1.

|                 |           |                   |            |
|-----------------|-----------|-------------------|------------|
| Mn(1)- O(4)     | 2.082(5)  | O(1)-Mn(1)-N(1)   | 83.9(2)    |
| Mn(1)- O(1)     | 2.130(4)  | O(1)-Mn(1)-N(2)   | 161.83(18) |
| Mn(1)- N(1)     | 2.152(6)  | O(2)-Mn(1)-O(3)   | 57.36(14)  |
| Mn(1)- O(2)     | 2.266(4)  | O(2)-Mn(1)-O(4)   | 93.00(18)  |
| Mn(1)- O(3)     | 2.298(5)  | O(2)-Mn(1)-N(1)   | 157.19(19) |
| Mn(1)- N(2)     | 2.365(6)  | O(2)-Mn(1)-N(2)   | 115.30(19) |
| Mn(2)- O(5)     | 2.126(5)  | O(3)-Mn(1)-O(4)   | 146.36(18) |
| Mn(2)- O(5)     | 2.126(5)  | O(3)-Mn(1)-N(1)   | 108.84(19) |
| Mn(2)- O(2)     | 2.179(4)  | O(3)-Mn(1)-N(2)   | 85.73(19)  |
| Mn(2)- O(2)     | 2.179(4)  | O(4)-Mn(1)-N(1)   | 104.2(2)   |
| Mn(2)- O(1)     | 2.206(4)  | O(4)-Mn(1)-N(2)   | 94.7(2)    |
| Mn(2)- O(1)     | 2.206(4)  | N(1)-Mn(1)-N(2)   | 78.6(2)    |
| O(1)- C(1)      | 1.310(7)  | O(1)-Mn(2)-O(2)   | 80.20(16)  |
| C(2)- C(1)      | 1.395(8)  | O(1)-Mn(2)-O(5)   | 88.99(15)  |
| C(4)- C(5)      | 1.347(10) | O(1)-Mn(2)-O(1a)  | 180.00     |
| C(4)- C(3)      | 1.374(10) | O(1)-Mn(2)-O(2a)  | 99.80(16)  |
| C(3)- C(2)      | 1.372(8)  | O(1)-Mn(2)-O(5a)  | 91.01(15)  |
| C(1)- C(6)      | 1.414(9)  | O(2)-Mn(2)-O(5)   | 90.65(16)  |
| C(6)- C(5)      | 1.418(9)  | O(1a)-Mn(2)-O(2)  | 99.80(16)  |
| C(6)- C(7)      | 1.427(9)  | O(2)-Mn(2)-O(2a)  | 180.00     |
| C(7)- N(1)      | 1.260(9)  | O(2)-Mn(2)-O(5a)  | 89.35(16)  |
| N(1)- C(8)      | 1.461(9)  | O(1a)-Mn(2)-O(5)  | 91.01(15)  |
| C(8)- C(9)      | 1.465(12) | O(2a)-Mn(2)-O(5)  | 89.35(16)  |
| C(1)- C(6)      | 1.414(9)  | O(5)-Mn(2)-O(5a)  | 180.00     |
| O(1)-Mn(1)-O(2) | 79.94(16) | O(1a)-Mn(2)-O(2a) | 80.20(16)  |
| O(1)-Mn(1)-O(3) | 95.45(16) | O(1a)-Mn(2)-O(5a) | 88.99(15)  |
| O(1)-Mn(1)-O(4) | 94.24(18) | O(2a)-Mn(2)-O(5a) | 90.65(16)  |

**Table. S2** Selected bond length (Å) and bond angles (°) of Complex **2**.

|                  |           |                   |            |
|------------------|-----------|-------------------|------------|
| Co(1)- O(3)      | 2.041(4)  | O(3)-Co(1)-O(4a)  | 90.71(14)  |
| Co(2)- O(2)      | 2.017(4)  | O(1a)-Co(1)-O(4)  | 99.68(13)  |
| Co(1)- O(1)      | 2.086(3)  | O(3a)-Co(1)-O(4)  | 90.71(14)  |
| Co(1)- O(4)      | 2.159(3)  | O(4)-Co(1)-O(4a)  | 180.00     |
| Co(2)-N(1)       | 2.018(4)  | O(1a)-Co(1)-O(3a) | 91.38(14)  |
| Co(2)- O(1)      | 2.044(4)  | O(1a)-Co(1)-O(4a) | 80.32(13)  |
| Co(2)- O(4)      | 2.184(4)  | O(3a)-Co(1)-O(4a) | 89.29(14)  |
| Co(2)- O(5)      | 2.186(4)  | O(1)-Co(2)-O(2)   | 94.30(15)  |
| Co(2)- N(2)      | 2.304(4)  | O(1)-Co(2)-O(4)   | 80.62(14)  |
| N(1)- C(8)       | 1.469(7)  | O(1)-Co(2)-O(5)   | 94.01(16)  |
| O(1)- C(1)       | 1.301(6)  | O(1)-Co(2)-N(1)   | 88.94(17)  |
| C(1)-C(2)        | 1.395(7)  | O(1)-Co(2)-N(2)   | 169.46(14) |
| C(1)- C(6)       | 1.416(7)  | O(2)-Co(2)-O(4)   | 94.22(15)  |
| C(2)- C(3)       | 1.369(7)  | O(2)-Co(2)-O(5)   | 150.90(15) |
| C(3)- C(4)       | 1.377(8)  | O(2)-Co(2)-N(1)   | 101.11(17) |
| C(5)- C(4)       | 1.357(8)  | O(2)-Co(2)-N(2)   | 91.13(15)  |
| C(6)- C(5)       | 1.402(7)  | O(2)-Co(2)-C(14)  | 123.80(17) |
| C(6)- C(7)       | 1.445(8)  | O(4)-Co(2)-O(5)   | 59.82(13)  |
| N(1)- C(7)       | 1.276(7)  | O(4)-Co(2)-N(1)   | 162.07(16) |
| N(2)- C(9)       | 1.475(7)  | O(4)-Co(2)-N(2)   | 108.02(15) |
| O(1)-Co(1)-O(3)  | 91.38(14) | O(4)-Co(2)-C(14)  | 30.26(16)  |
| O(1)-Co(1)-O(4)  | 80.32(13) | O(5)-Co(2)-N(1)   | 106.89(16) |
| O(1)-Co(1)-O(1a) | 180.00    | O(5)-Co(2)-N(2)   | 85.54(17)  |
| O(1)-Co(1)-O(3a) | 88.62(14) | O(5)-Co(2)-C(14)  | 29.62(16)  |
| O(1)-Co(1)-O(4a) | 99.68(13) | N(1)-Co(2)-N(2)   | 81.14(17)  |
| O(3)-Co(1)-O(4)  | 89.29(14) | N(1)-Co(2)-C(14)  | 135.03(18) |
| O(1a)-Co(1)-O(3) | 88.62(14) | N(2)-Co(2)-C(14)  | 98.76(18)  |
| O(3)-Co(1)-O(3a) | 180.00    |                   |            |

**Table. S3** Selected bond length (Å) and bond angles (°) of Complex **3**.

|                 |           |                     |           |
|-----------------|-----------|---------------------|-----------|
| Ni(1)-O(1)      | 2.0212(2) | O(3)-Ni(1)-N(1)     | 99.08(1)  |
| Ni(1)-O(3)      | 2.0010(2) | O(3)-Ni(1)-N(2)     | 91.99(1)  |
| Ni(1)-O(4)      | 2.2184(3) | O(4)-Ni(1)-O(5)     | 61.20(1)  |
| Ni(1)-O(5)      | 2.1294(2) | O(4)-Ni(1)-N(1)     | 104.33(1) |
| Ni(1)-N(1)      | 1.9869(2) | O(4)-Ni(1)-N(2)     | 88.47(1)  |
| Ni(1)-N(2)      | 2.2050(3) | O(5)-Ni(1)-N(1)     | 162.31(1) |
| Ni(2)-O(1)      | 2.0775(2) | O(5)-Ni(1)-N(2)     | 105.36(1) |
| Ni(2)-O(2)      | 2.0103(2) | N(1)-Ni(1)-N(2)     | 83.12(1)  |
| Ni(2)-O(5)      | 2.1248(2) | O(1)-Ni(2)-O(2)     | 91.34(1)  |
| Ni(2)-O(1_a)    | 2.0775(2) | O(1)-Ni(2)-O(5)     | 80.59(1)  |
| Ni(2)-O(2_a)    | 2.0103(2) | O(1)-Ni(2)-O(1_a)   | 180.00    |
| Ni(2)-O(5_a)    | 2.1248(2) | O(1)-Ni(2)-O(2_a)   | 88.66(1)  |
| O(1)-C(1)       | 1.2918(2) | O(1)-Ni(2)-O(5_a)   | 99.41(1)  |
| O(2)-C(16)      | 1.2638(1) | O(2)-Ni(2)-O(5)     | 89.33(1)  |
| O(3)-C(16)      | 1.2644(1) | O(1_a)-Ni(2)-O(2)   | 88.66(1)  |
| O(4)-C(14)      | 1.2712(1) | O(2)-Ni(2)-O(2_a)   | 180.00    |
| O(5)-C(14)      | 1.2880(1) | O(2)-Ni(2)-O(5_a)   | 90.67(1)  |
| O(11)-C(11)     | 1.4038(2) | O(1_a)-Ni(2)-O(5)   | 99.41(1)  |
| O(11)-C(12)     | 1.4377(2) | O(2_a)-Ni(2)-O(5)   | 90.67(1)  |
| N(1)-C(7)       | 1.2720(1) | O(5)-Ni(2)-O(5_a)   | 180.00    |
| N(1)-C(8)       | 1.4659(2) | O(1_a)-Ni(2)-O(2_a) | 91.34(1)  |
| N(2)-C(9)       | 1.4963(2) | O(1_a)-Ni(2)-O(5_a) | 80.59(1)  |
| N(2)-C(10)      | 1.4909(2) | O(2_a)-Ni(2)-O(5_a) | 89.33(1)  |
| N(2)-C(13)      | 1.4971(2) | O(1)-Ni(1)-N(1)     | 88.89(1)  |
| O(1)-Ni(1)-O(3) | 91.40(1)  | O(1)-Ni(1)-N(2)     | 171.72(1) |
| O(1)-Ni(1)-O(4) | 91.43(1)  | O(3)-Ni(1)-O(4)     | 156.46(1) |
| O(1)-Ni(1)-O(5) | 81.77(1)  | O(3)-Ni(1)-O(5)     | 96.15(1)  |

## 6. PXRD

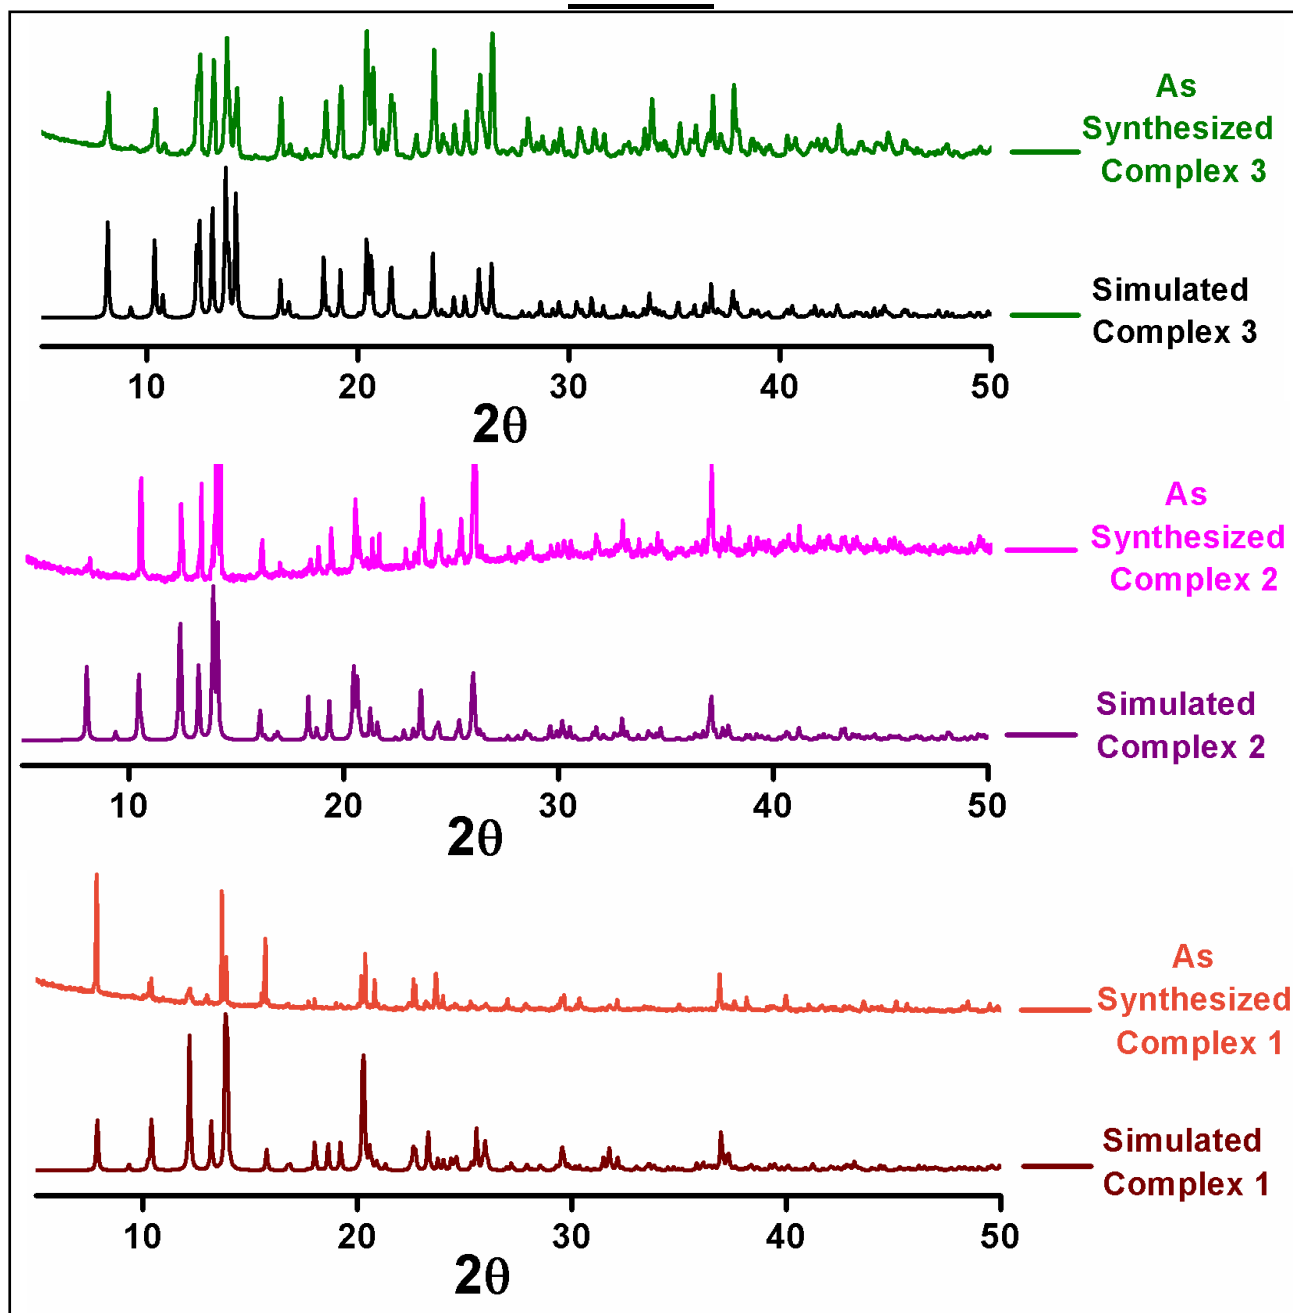

Fig. S13 PXRD patterns of Complex 1, 2 and 3.

## 7. Catechol Oxidation Kinetic study

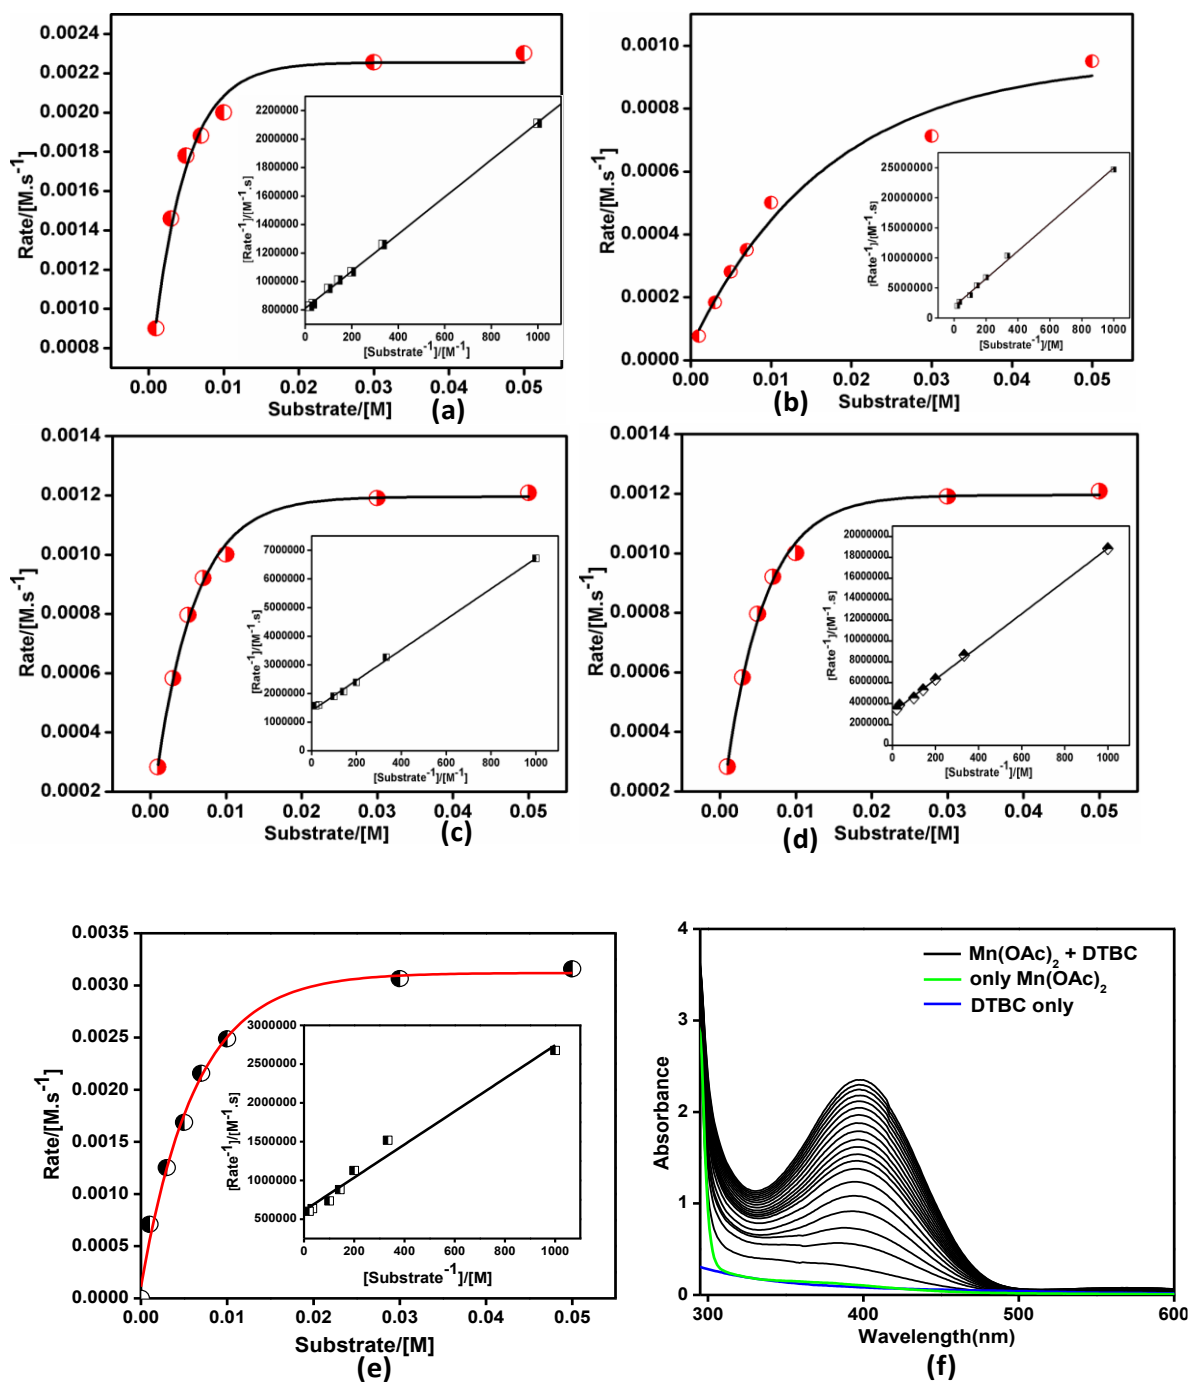

**Fig. S14** Dependence of the rate of reaction on the substrate concentration (insets: Lineweaver Burk plot) for (a) Mn(II) and (b) Mn(III) of complex 1 (c), (d) for complex 2 and complex 3 respectively and (e) represent only Mn(OAc)<sub>2</sub> salt and (f) represent UV-Vis study of Mn(OAc)<sub>2</sub> in presence of 3,5 DTBC.

**Table. S4 Measurement of Conductance of complex (1-3) and the only acetate salt of Mn, Co, and Ni with time.**

| Time                                         | 0 minute         | 10 minute | 30 minute | 60 minute | 120 minute | 180 minute | After 1day |
|----------------------------------------------|------------------|-----------|-----------|-----------|------------|------------|------------|
| Only Mn(OAc) <sub>2</sub> .2H <sub>2</sub> O | 10.00            | 9.26      | 7.45      | 6.01      | 4.52       | 3.09       | 3.00       |
| Only Co(OAc) <sub>2</sub> .2H <sub>2</sub> O | 12.13            | 12.10     | 11.28     | 11.20     | 10.50      | 10.48      | 10.46      |
| Only Ni(OAc) <sub>2</sub> .2H <sub>2</sub> O | 11.80            | 11.78     | 11.80     | 11.75     | 11.76      | 11.75      | 11.70      |
| Only complex 1                               | 4.10             | 6.20      | 10.06     | 14.24     | 20.00      | 26.20      | 25.02      |
| Only complex 2                               | 3.58             | 5.02      | 6.70      | 7.05      | 7.01       | 7.03       | 7.52       |
| Only complex 3                               | 3.25             | 3.32      | 3.33      | 3.33      | 3.33       | 3.34       | 3.33       |
| Compound                                     | Conductance (μS) |           |           |           |            |            |            |

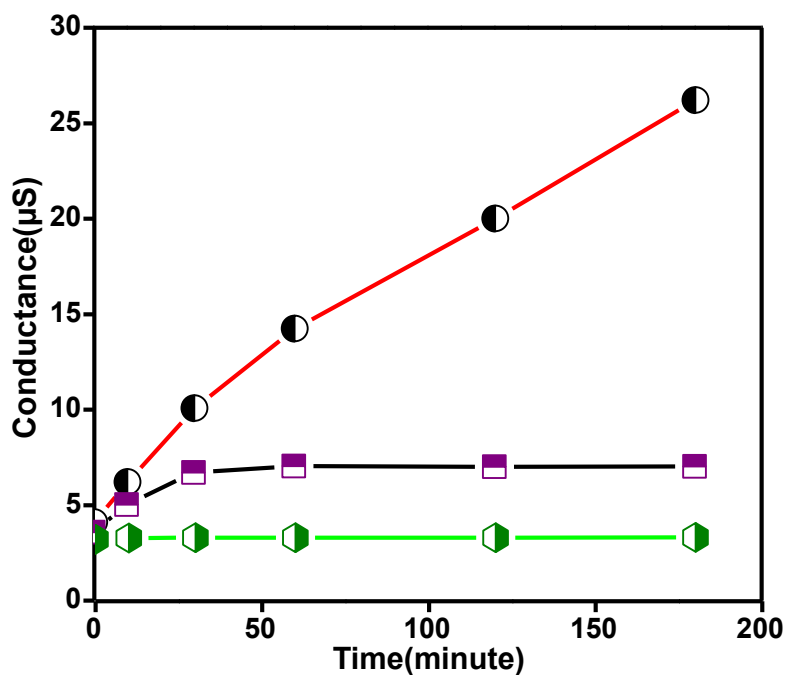

**Fig. S15 Measurement of Conductance with time of complex (1-3)**

## 8. Catalytic Cycle of Catechol Oxidation for complex 2.

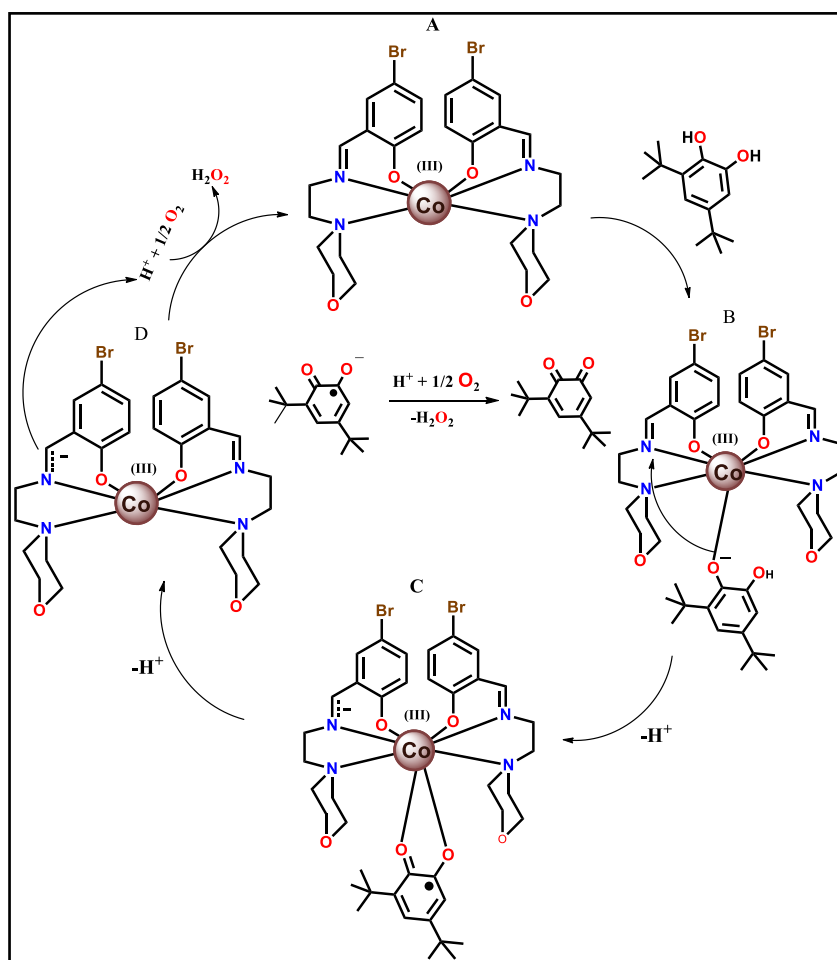

**Fig. S16** Probable mechanistic pathway for oxidation of 3,5 DTBC to 3,5 DTBQ in presence of complex 2.

For  $[\text{Co}_3\text{L}_2(\text{OAc})_4]$  ESI-MS generates a peak  $m/z$  at 683.02 which corresponds to two Schiff base coordinated to a single cobalt centre i.e complex 2 exists as a mononuclear species in solution phase. From the EPR study it was observed that Complex 2 was EPR silent, which proved that Complex 2 exists as Cobalt(III) species in solution state. And after addition of 3,5 DTBC eight line spectrum was observed. From the simulation data  $g$  value of approximate 2 was obtained for the eight line spectrum and  $Lw$  value is also very low. That represent a radical species is generated during this reaction but if there is generation a imine radical there must be a single line soectrum in EPR study. But here we observe eight line spectrum due to the coupling between the centran metal  $\text{Co}^{59}$  and the imine radical. From the above point of view we try to give a probable mechanistic



path way for oxidation of 3,5 DTBC to 3,5 DTBQ by complex **2**. In first step 3,5 DTBC form a adduct with complex **2** by release of a proton(Supporting Information, B, Fig. S14). During the course of oxidation 3,5 DTBC moiety gives a electron from oxygen centre to the cobalt(III) center and during this reaction radical species is generated but if there is generation a imine radical and observe eight line spectrum due to the coupling between the centran metal  $\text{Co}^{59}$  and the imine radical. EPR spectrum of complex **2** in presence and in absence of catechol are given in Fig.9.

## 10. Catalytic Cycle of Catechol Oxidation for complex **2**.

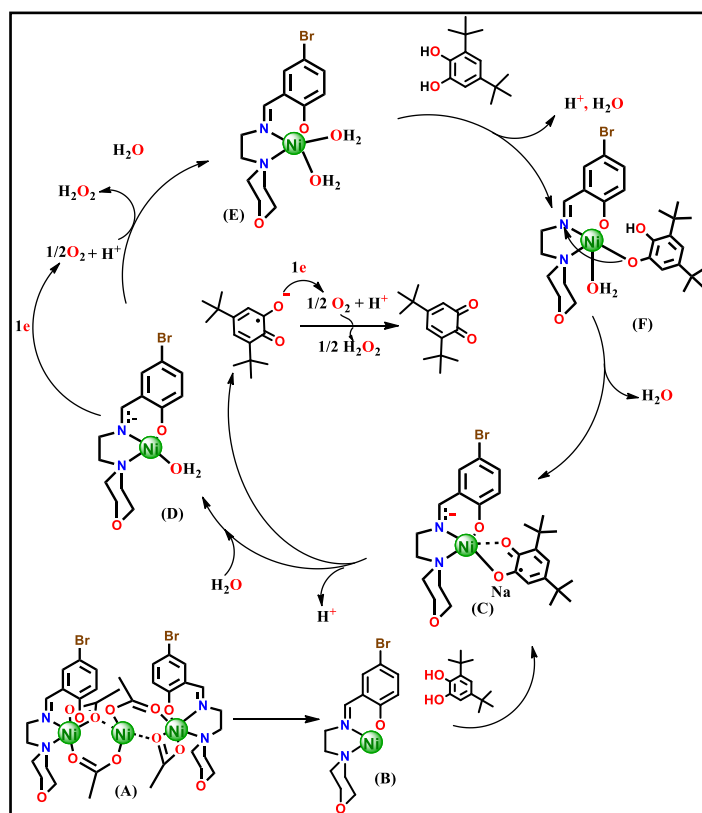

**Fig. S17** Probable mechanistic pathway for oxidation of 3,5 DTBC to 3,5 DTBQ in presence of complex **3**.

Complex **3** i.e.  $[\text{Ni}_3\text{L}_2(\text{OAc})_4]$ , also exists as a mononuclear species in solution phase. It generates a peak at  $m/z$  at 368.97 consisted with the formula  $[(\text{C}_{13}\text{H}_{16}\text{BrN}_2\text{O}_2\text{Ni}(\text{II}))]$ . In solution phase complex **3** remained EPR silent. With addition of 3,5 DTBC to complex **3**, a sharp signal is generated at  $g = 2.009$  which is indicative of formation of a radical during the course of the oxidation reaction. With the help of ESI-MS and EPR study we proposed a plausible mechanism for oxidation of 3, 5 DTBC to 3,5 DTBQ by complex **3**.

In first step  $[(C_{13}H_{16}BrN_2O_2Ni(II))]$  forms an adduct with 3,5 DTBC through the release of two protons (Supporting Information d, Figure S16) During the course of the oxidation of 3,5 DTBC to 3,5 DTBQ a imine radical is duly generated, which was responsible for generation a peak at  $g = 2.009$  (Supporting Information E, Fig. S17). In the final step, the imine species gives up an electron to form  $H_2O_2$ .

### **11. UV-Vis spectra of the reaction mixture of 3,5 DTBC and complex 1,2 and 3 and KI.**

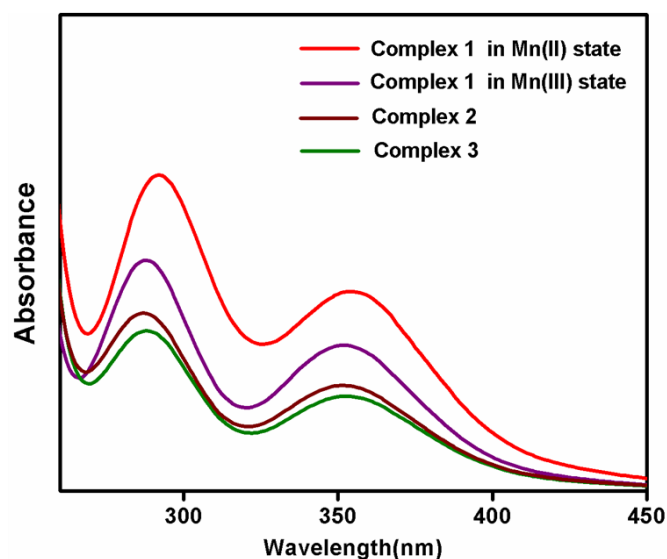

**Fig. S18.** UV-Vis spectra of the reaction mixture of 3,5 DTBC and complex 1,2 and 3 and KI.

**Table. S5** Experimental and simulated EPR data of all complexes(1-3).

| Complex           | Conditions                                               | A(G)                                      | Line width (Lw) | g              |
|-------------------|----------------------------------------------------------|-------------------------------------------|-----------------|----------------|
| Complex 1 Mn(II)  | DMF Solution at Room Temperature                         | $^{55}Mn$ , 85.8                          | 7.5             | 2.011          |
| Complex 1 Mn(III) | DMF Solution at Room Temperature in presence of catechol | $^{55}Mn(I=5/2)$ , 82.85<br>Imine Radical | 8<br>0.8        | 1.998<br>2.001 |
| Complex 2         | DMF Solution at Room Temperature in presence of catechol | $^{59}Co(I=7/2)$ , 9.24                   | 0.5             | 2.005          |
| Complex 3         | DMF Solution at Room Temperature in presence of catechol | Imine Radical                             | 0.5             | 2.009          |

## 12. Coordinates and Energies of the Optimized Structures

### Intermediate A

|    |              |              |              |
|----|--------------|--------------|--------------|
| Mn | 0.008941000  | -0.631679000 | 0.019638000  |
| O  | 1.061654000  | 0.781058000  | -0.988183000 |
| C  | 4.049041000  | 3.340131000  | 0.337343000  |
| C  | 3.411259000  | 3.513907000  | -0.907870000 |
| H  | 3.709158000  | 4.338399000  | -1.550619000 |
| C  | 2.415942000  | 2.661713000  | -1.323936000 |
| H  | 1.921551000  | 2.795195000  | -2.281048000 |
| C  | 1.971890000  | 1.564567000  | -0.524572000 |
| C  | 2.623420000  | 1.399764000  | 0.745272000  |
| C  | 2.286451000  | 0.367521000  | 1.688061000  |
| H  | 2.875138000  | 0.382489000  | 2.616660000  |
| N  | 1.377481000  | -0.536752000 | 1.563468000  |
| C  | 1.115370000  | -1.409423000 | 2.699882000  |
| H  | 0.563904000  | -0.850227000 | 3.465993000  |
| H  | 2.044453000  | -1.766634000 | 3.164944000  |
| C  | 0.293649000  | -2.605945000 | 2.236466000  |
| H  | -0.008764000 | -3.220329000 | 3.101181000  |
| H  | 0.914914000  | -3.228099000 | 1.582473000  |
| N  | -0.881635000 | -2.181513000 | 1.455731000  |
| C  | -1.544121000 | -3.345776000 | 0.862809000  |
| H  | -2.042504000 | -3.956053000 | 1.632614000  |
| H  | -0.815976000 | -3.973606000 | 0.350876000  |
| C  | -1.864839000 | -1.509735000 | 2.323596000  |
| H  | -1.454075000 | -0.589340000 | 2.732074000  |
| H  | -2.182860000 | -2.190940000 | 3.129382000  |
| C  | 3.646751000  | 2.294725000  | 1.134244000  |
| H  | 4.117169000  | 2.141435000  | 2.104185000  |
| O  | -1.111140000 | 0.763678000  | 0.938008000  |
| C  | -4.452454000 | 2.857532000  | -0.352808000 |
| C  | -3.858934000 | 3.091039000  | 0.904586000  |
| H  | -4.280788000 | 3.845527000  | 1.563890000  |
| C  | -2.751923000 | 2.386064000  | 1.311734000  |
| H  | -2.285462000 | 2.571607000  | 2.274414000  |
| C  | -2.144081000 | 1.384315000  | 0.493441000  |
| C  | -2.764956000 | 1.144018000  | -0.780604000 |
| C  | -2.288894000 | 0.166431000  | -1.722598000 |

|   |              |              |              |
|---|--------------|--------------|--------------|
| H | -2.816957000 | 0.155164000  | -2.686872000 |
| N | -1.330655000 | -0.676532000 | -1.548314000 |
| C | -0.943303000 | -1.546451000 | -2.646865000 |
| H | -1.358147000 | -2.550567000 | -2.480763000 |
| H | -1.336781000 | -1.187186000 | -3.607392000 |
| C | 0.581960000  | -1.598957000 | -2.704308000 |
| H | 0.921953000  | -2.220088000 | -3.549466000 |
| H | 0.954695000  | -0.579556000 | -2.828956000 |
| N | 1.135149000  | -2.111014000 | -1.431059000 |
| C | 2.568004000  | -1.792090000 | -1.333933000 |
| H | 3.135147000  | -2.292909000 | -2.134664000 |
| H | 2.704835000  | -0.714573000 | -1.404124000 |
| C | 1.006310000  | -3.569579000 | -1.396886000 |
| H | -0.029701000 | -3.873126000 | -1.552290000 |
| H | 1.621840000  | -4.033879000 | -2.184261000 |
| C | -3.896756000 | 1.898479000  | -1.166612000 |
| H | -4.333622000 | 1.699560000  | -2.144180000 |
| H | 4.832210000  | 4.017253000  | 0.659242000  |
| H | -5.322064000 | 3.422576000  | -0.669094000 |
| H | -2.731971000 | -1.230175000 | 1.720504000  |
| H | -2.293599000 | -3.002427000 | 0.143428000  |
| H | 2.942121000  | -2.135247000 | -0.364729000 |
| H | 1.345431000  | -3.952978000 | -0.430379000 |

#### Intermediate B

|    |             |              |              |
|----|-------------|--------------|--------------|
| Mn | 0.202108000 | -0.371068000 | -0.454600000 |
| O  | 2.043659000 | -0.356415000 | -1.294793000 |
| C  | 5.745932000 | -1.226859000 | 0.358032000  |
| C  | 5.615312000 | -0.520717000 | -0.857107000 |
| H  | 6.508809000 | -0.200894000 | -1.387481000 |
| C  | 4.380968000 | -0.233126000 | -1.385356000 |
| H  | 4.276728000 | 0.305545000  | -2.321985000 |
| C  | 3.166617000 | -0.620271000 | -0.735462000 |
| C  | 3.309624000 | -1.329002000 | 0.506363000  |
| C  | 2.203096000 | -1.815365000 | 1.281715000  |
| H  | 2.497449000 | -2.463615000 | 2.121776000  |
| N  | 0.940009000 | -1.590117000 | 1.114794000  |
| C  | 0.029583000 | -2.257336000 | 2.039036000  |
| H  | 0.583352000 | -2.979049000 | 2.654756000  |

|   |              |              |              |
|---|--------------|--------------|--------------|
| H | -0.719044000 | -2.796548000 | 1.451700000  |
| C | -0.768400000 | -1.300082000 | 2.962608000  |
| H | -0.673355000 | -1.591911000 | 4.014712000  |
| H | -1.813818000 | -1.318919000 | 2.667223000  |
| N | -0.308212000 | 0.117744000  | 2.877762000  |
| C | -1.395801000 | 1.076640000  | 3.191071000  |
| H | -1.746964000 | 0.908267000  | 4.212156000  |
| H | -2.194619000 | 0.916802000  | 2.465823000  |
| C | 0.897759000  | 0.364676000  | 3.699712000  |
| H | 1.649836000  | -0.386291000 | 3.457204000  |
| H | 0.629355000  | 0.307947000  | 4.757534000  |
| C | 4.601567000  | -1.621867000 | 1.006599000  |
| H | 4.673697000  | -2.175876000 | 1.941702000  |
| O | 0.628274000  | 1.285089000  | 0.680309000  |
| C | 0.522980000  | 5.311281000  | -0.365415000 |
| C | 0.890649000  | 4.888257000  | 0.918939000  |
| H | 1.170791000  | 5.621623000  | 1.670814000  |
| C | 0.913637000  | 3.546507000  | 1.240431000  |
| H | 1.231228000  | 3.225086000  | 2.228858000  |
| C | 0.568447000  | 2.529803000  | 0.309138000  |
| C | 0.190070000  | 2.972104000  | -1.000091000 |
| C | -0.235554000 | 2.093533000  | -2.076719000 |
| H | -0.472843000 | 2.602769000  | -3.021516000 |
| N | -0.389958000 | 0.826539000  | -2.008671000 |
| C | -0.894849000 | 0.088164000  | -3.153594000 |
| H | -1.977028000 | -0.043386000 | -3.020492000 |
| H | -0.736699000 | 0.632422000  | -4.094831000 |
| C | -0.182780000 | -1.261803000 | -3.203927000 |
| H | -0.567893000 | -1.874594000 | -4.035749000 |
| H | 0.885226000  | -1.080770000 | -3.356098000 |
| N | -0.319866000 | -1.974824000 | -1.920065000 |
| C | 0.661127000  | -3.060742000 | -1.838084000 |
| H | 0.510726000  | -3.796254000 | -2.644731000 |
| H | 1.667278000  | -2.642464000 | -1.900554000 |
| C | -1.667325000 | -2.530580000 | -1.761268000 |
| H | -2.422032000 | -1.752311000 | -1.883160000 |
| H | -1.847739000 | -3.326558000 | -2.501939000 |
| C | 0.184702000  | 4.348900000  | -1.295119000 |
| H | -0.105164000 | 4.651831000  | -2.299580000 |

|   |              |              |              |
|---|--------------|--------------|--------------|
| H | 6.724991000  | -1.454769000 | 0.764364000  |
| H | 0.507379000  | 6.364261000  | -0.622993000 |
| H | 1.288322000  | 1.351305000  | 3.451056000  |
| H | -0.998274000 | 2.088004000  | 3.082309000  |
| H | 0.546799000  | -3.566757000 | -0.874911000 |
| H | -1.778671000 | -2.930187000 | -0.750636000 |
| O | -1.585020000 | -0.547560000 | 0.517533000  |
| C | -2.832378000 | -0.319467000 | 0.198797000  |
| C | -3.820590000 | -1.288661000 | 0.526256000  |
| C | -3.291027000 | 0.849799000  | -0.434747000 |
| C | -5.156112000 | -1.104706000 | 0.211580000  |
| C | -4.638724000 | 1.035086000  | -0.749840000 |
| H | -2.552423000 | 1.615304000  | -0.657010000 |
| C | -5.577744000 | 0.061293000  | -0.437065000 |
| H | -5.878279000 | -1.877637000 | 0.473181000  |
| H | -4.950379000 | 1.953479000  | -1.239474000 |
| H | -6.626284000 | 0.197454000  | -0.679247000 |
| O | -3.358056000 | -2.416765000 | 1.176292000  |
| H | -4.115035000 | -2.999391000 | 1.331391000  |
| H | -0.037520000 | 0.369827000  | 1.890482000  |

#### Intermediate C

|    |              |              |              |
|----|--------------|--------------|--------------|
| Mn | 0.118324000  | -0.376046000 | -0.278627000 |
| O  | 2.262375000  | 0.270932000  | -1.307187000 |
| C  | 5.960977000  | -1.061728000 | 0.061648000  |
| C  | 5.827178000  | -0.475632000 | -1.197952000 |
| H  | 6.688672000  | -0.354045000 | -1.846493000 |
| C  | 4.575945000  | -0.034380000 | -1.610989000 |
| H  | 4.432911000  | 0.442327000  | -2.575475000 |
| C  | 3.454299000  | -0.177136000 | -0.798371000 |
| C  | 3.554322000  | -0.801868000 | 0.466842000  |
| C  | 2.483864000  | -1.099263000 | 1.405499000  |
| H  | 2.861816000  | -1.521242000 | 2.341750000  |
| N  | 1.175424000  | -1.011138000 | 1.272335000  |
| C  | 0.445758000  | -1.502917000 | 2.450873000  |
| H  | 1.144648000  | -1.957930000 | 3.162970000  |
| H  | -0.272169000 | -2.263620000 | 2.131538000  |
| C  | -0.405563000 | -0.433308000 | 3.170325000  |
| H  | -0.287434000 | -0.502424000 | 4.257012000  |

|   |              |              |              |
|---|--------------|--------------|--------------|
| H | -1.445853000 | -0.588133000 | 2.892936000  |
| N | -0.050266000 | 0.969702000  | 2.792724000  |
| C | -1.170189000 | 1.899647000  | 3.086401000  |
| H | -1.400976000 | 1.850236000  | 4.153659000  |
| H | -2.018691000 | 1.583466000  | 2.480415000  |
| C | 1.213413000  | 1.422655000  | 3.416822000  |
| H | 1.996290000  | 0.696967000  | 3.194387000  |
| H | 1.065625000  | 1.510392000  | 4.496120000  |
| C | 4.845839000  | -1.213713000 | 0.866105000  |
| H | 4.952619000  | -1.686519000 | 1.839570000  |
| O | 0.613449000  | 1.629244000  | 0.229588000  |
| C | -1.178741000 | 5.117166000  | -1.173851000 |
| C | -0.386374000 | 5.112590000  | -0.021757000 |
| H | -0.216792000 | 6.035849000  | 0.525443000  |
| C | 0.200776000  | 3.939230000  | 0.419169000  |
| H | 0.848412000  | 3.939581000  | 1.292639000  |
| C | 0.015745000  | 2.706200000  | -0.246061000 |
| C | -0.785819000 | 2.717415000  | -1.424196000 |
| C | -1.049173000 | 1.547746000  | -2.252595000 |
| H | -1.534754000 | 1.762670000  | -3.213754000 |
| N | -0.790764000 | 0.329276000  | -1.950008000 |
| C | -1.162769000 | -0.716668000 | -2.894348000 |
| H | -2.153757000 | -1.094389000 | -2.609041000 |
| H | -1.230612000 | -0.337029000 | -3.922746000 |
| C | -0.113246000 | -1.818368000 | -2.810743000 |
| H | -0.370632000 | -2.661543000 | -3.472697000 |
| H | 0.849463000  | -1.404121000 | -3.128605000 |
| N | 0.046415000  | -2.273795000 | -1.417550000 |
| C | 1.298969000  | -3.020917000 | -1.269239000 |
| H | 1.308841000  | -3.913455000 | -1.915672000 |
| H | 2.143944000  | -2.378159000 | -1.529610000 |
| C | -1.079528000 | -3.125323000 | -1.011141000 |
| H | -2.026739000 | -2.602207000 | -1.158889000 |
| H | -1.091773000 | -4.059987000 | -1.594621000 |
| C | -1.352458000 | 3.928301000  | -1.859044000 |
| H | -1.953480000 | 3.914649000  | -2.766108000 |
| H | 6.929456000  | -1.406049000 | 0.409577000  |
| H | -1.636819000 | 6.033130000  | -1.530173000 |
| H | 1.486446000  | 2.388110000  | 2.989299000  |

|   |              |              |              |
|---|--------------|--------------|--------------|
| H | -0.868248000 | 2.909944000  | 2.804192000  |
| H | 1.408011000  | -3.333251000 | -0.227630000 |
| H | -0.998793000 | -3.359547000 | 0.053378000  |
| O | -1.797700000 | 0.038503000  | 0.803422000  |
| C | -2.873295000 | -0.550691000 | 0.447724000  |
| C | -3.228563000 | -1.850017000 | 1.075187000  |
| C | -3.750702000 | -0.012219000 | -0.543769000 |
| C | -4.430891000 | -2.500304000 | 0.611159000  |
| C | -4.881129000 | -0.687535000 | -0.938833000 |
| H | -3.484551000 | 0.953260000  | -0.966962000 |
| C | -5.218752000 | -1.944101000 | -0.359721000 |
| H | -4.674666000 | -3.454188000 | 1.070128000  |
| H | -5.532691000 | -0.259943000 | -1.695696000 |
| H | -6.117325000 | -2.456534000 | -0.691871000 |
| O | -2.486821000 | -2.354931000 | 1.952337000  |
| H | 0.105067000  | 1.028951000  | 1.751375000  |
| H | 1.880962000  | 0.988436000  | -0.733324000 |

#### Intermediate D

|    |              |              |              |
|----|--------------|--------------|--------------|
| Mn | 0.038377000  | 0.101330000  | 0.688130000  |
| O  | 1.978134000  | -0.345435000 | 1.651280000  |
| C  | 5.577203000  | 1.364306000  | 0.325296000  |
| C  | 5.577114000  | 0.066664000  | 0.852776000  |
| H  | 6.496552000  | -0.497318000 | 0.942315000  |
| C  | 4.367412000  | -0.492282000 | 1.272490000  |
| H  | 4.347488000  | -1.486984000 | 1.706638000  |
| C  | 3.182671000  | 0.216837000  | 1.149392000  |
| C  | 3.134050000  | 1.509991000  | 0.579906000  |
| C  | 1.954756000  | 2.303807000  | 0.367552000  |
| H  | 2.171104000  | 3.344313000  | 0.114136000  |
| N  | 0.666568000  | 1.928951000  | 0.383382000  |
| C  | -0.288225000 | 3.054096000  | 0.107118000  |
| H  | 0.249198000  | 4.010298000  | 0.196387000  |
| H  | -1.061172000 | 3.025592000  | 0.877591000  |
| C  | -1.073023000 | 3.005093000  | -1.213951000 |
| H  | -1.697305000 | 3.904298000  | -1.261930000 |
| H  | -1.698965000 | 2.118108000  | -1.254444000 |
| N  | -0.247304000 | 3.005859000  | -2.509458000 |
| C  | 0.601362000  | 1.730319000  | -2.651865000 |



|   |              |              |              |
|---|--------------|--------------|--------------|
| H | -0.152134000 | 0.923851000  | -2.563644000 |
| H | 1.331149000  | 1.678928000  | -1.857465000 |
| C | -1.241353000 | 3.005639000  | -3.686714000 |
| H | -1.948078000 | 3.826565000  | -3.551125000 |
| H | -1.713546000 | 1.991499000  | -3.610752000 |
| C | 4.387459000  | 2.065258000  | 0.199299000  |
| H | 4.393474000  | 3.064326000  | -0.224289000 |
| O | 0.957988000  | -0.494804000 | -0.869563000 |
| C | 1.878499000  | -4.301907000 | -2.309712000 |
| C | 2.279432000  | -3.129902000 | -2.989386000 |
| H | 2.846457000  | -3.214213000 | -3.909959000 |
| C | 1.954601000  | -1.882028000 | -2.499664000 |
| H | 2.250494000  | -0.976235000 | -3.012406000 |
| C | 1.211159000  | -1.722820000 | -1.299782000 |
| C | 0.802916000  | -2.914413000 | -0.615161000 |
| C | 0.033970000  | -2.865774000 | 0.592776000  |
| H | -0.242870000 | -3.834127000 | 1.021567000  |
| N | -0.368010000 | -1.774464000 | 1.194687000  |
| C | -1.184435000 | -1.884899000 | 2.432269000  |
| H | -2.219531000 | -1.663304000 | 2.162089000  |
| H | -1.133077000 | -2.894941000 | 2.860613000  |
| C | -0.626381000 | -0.850454000 | 3.419114000  |
| H | -1.193010000 | -0.840176000 | 4.360539000  |
| H | 0.422102000  | -1.082208000 | 3.625811000  |
| N | -0.657350000 | 0.508371000  | 2.762699000  |
| C | 0.275973000  | 1.454014000  | 3.462088000  |
| H | 0.006793000  | 1.553672000  | 4.523126000  |
| H | 1.290460000  | 1.074003000  | 3.354258000  |
| C | -2.056982000 | 1.060307000  | 2.803673000  |
| H | -2.755494000 | 0.289042000  | 2.492619000  |
| H | -2.294882000 | 1.394384000  | 3.823002000  |
| C | 1.150901000  | -4.183047000 | -1.143969000 |
| H | 0.825310000  | -5.072949000 | -0.612181000 |
| H | 6.506949000  | 1.820010000  | 0.006197000  |
| H | 2.134271000  | -5.276910000 | -2.705025000 |
| H | -0.664959000 | 3.129426000  | -4.606481000 |
| H | 1.064061000  | 1.764988000  | -3.641863000 |
| H | 0.206642000  | 2.422451000  | 2.966780000  |
| H | -2.153924000 | 1.866020000  | 2.083116000  |

|   |              |              |              |
|---|--------------|--------------|--------------|
| O | -1.604145000 | 0.566108000  | 0.037492000  |
| C | -2.721723000 | -0.009161000 | -0.643173000 |
| C | -3.919961000 | 0.392950000  | 0.243075000  |
| C | -2.577141000 | -1.468487000 | -0.922660000 |
| C | -4.669405000 | -0.696592000 | 0.868592000  |
| C | -3.338886000 | -2.395967000 | -0.316566000 |
| H | -1.838166000 | -1.676781000 | -1.684375000 |
| C | -4.384086000 | -1.998209000 | 0.614323000  |
| H | -5.471560000 | -0.405485000 | 1.536964000  |
| H | -3.221648000 | -3.450824000 | -0.541834000 |
| H | -4.970926000 | -2.781511000 | 1.086665000  |
| O | -4.145484000 | 1.593086000  | 0.494406000  |
| H | 2.022671000  | -1.338550000 | 1.648373000  |
| O | -2.955819000 | 0.684751000  | -1.897772000 |
| O | -1.847036000 | 0.325561000  | -2.892967000 |
| H | 0.352935000  | 3.842301000  | -2.539247000 |

#### Intermediate E

|    |              |              |              |
|----|--------------|--------------|--------------|
| Mn | 0.118371000  | -0.165817000 | 0.942471000  |
| O  | 2.034908000  | -1.047198000 | 1.640726000  |
| C  | 5.555872000  | -0.304215000 | -0.451702000 |
| C  | 5.243110000  | -1.598034000 | -0.045491000 |
| H  | 5.919743000  | -2.419696000 | -0.256239000 |
| C  | 4.060737000  | -1.844660000 | 0.643719000  |
| H  | 3.817103000  | -2.849124000 | 0.980328000  |
| C  | 3.178597000  | -0.804732000 | 0.908738000  |
| C  | 3.457838000  | 0.502500000  | 0.492165000  |
| C  | 2.565365000  | 1.664692000  | 0.636105000  |
| H  | 3.060339000  | 2.630358000  | 0.502895000  |
| N  | 1.300877000  | 1.629325000  | 0.806139000  |
| C  | 0.609310000  | 2.905773000  | 0.666320000  |
| H  | 1.230923000  | 3.719101000  | 1.066313000  |
| H  | -0.342892000 | 2.854209000  | 1.197724000  |
| C  | 0.323278000  | 3.154029000  | -0.826647000 |
| H  | -0.182174000 | 4.123135000  | -0.914763000 |
| H  | -0.386430000 | 2.400029000  | -1.174103000 |
| N  | 1.557081000  | 3.128195000  | -1.608870000 |
| C  | 1.584747000  | 2.010358000  | -2.543199000 |

|   |              |              |              |
|---|--------------|--------------|--------------|
| H | 1.382436000  | 1.077042000  | -2.007123000 |
| H | 2.577354000  | 1.946518000  | -3.005374000 |
| C | 1.842250000  | 4.388307000  | -2.266072000 |
| H | 1.870850000  | 5.196043000  | -1.526979000 |
| H | 1.094156000  | 4.651448000  | -3.035290000 |
| C | 4.669071000  | 0.727117000  | -0.172837000 |
| H | 4.890677000  | 1.739415000  | -0.500503000 |
| O | 0.750393000  | -0.885030000 | -0.841537000 |
| C | -0.844789000 | -3.969018000 | -3.111856000 |
| C | -0.209880000 | -2.855336000 | -3.703189000 |
| H | -0.118860000 | -2.805477000 | -4.785321000 |
| C | 0.297254000  | -1.829410000 | -2.939133000 |
| H | 0.786890000  | -0.973005000 | -3.392211000 |
| C | 0.210492000  | -1.835025000 | -1.510789000 |
| C | -0.491044000 | -2.948972000 | -0.922913000 |
| C | -0.827094000 | -3.013802000 | 0.473612000  |
| H | -1.342803000 | -3.931102000 | 0.793769000  |
| N | -0.654782000 | -2.072366000 | 1.340588000  |
| C | -1.239148000 | -2.203326000 | 2.668286000  |
| H | -2.297662000 | -1.917985000 | 2.609639000  |
| H | -1.193364000 | -3.236471000 | 3.040157000  |
| C | -0.494044000 | -1.273632000 | 3.620806000  |
| H | -0.943520000 | -1.308764000 | 4.626736000  |
| H | 0.545838000  | -1.610866000 | 3.706386000  |
| N | -0.466454000 | 0.108440000  | 3.108571000  |
| C | 0.538098000  | 0.886996000  | 3.839954000  |
| H | 0.323730000  | 0.904168000  | 4.920376000  |
| H | 1.527973000  | 0.454318000  | 3.672021000  |
| C | -1.783975000 | 0.744668000  | 3.257958000  |
| H | -2.529013000 | 0.222728000  | 2.657317000  |
| H | -2.079572000 | 0.761690000  | 4.319286000  |
| C | -0.974049000 | -3.995967000 | -1.743875000 |
| H | -1.485177000 | -4.828596000 | -1.263325000 |
| H | 6.478369000  | -0.101969000 | -0.984343000 |
| H | -1.233916000 | -4.773527000 | -3.725202000 |
| H | 2.823437000  | 4.337357000  | -2.750938000 |
| H | 0.830463000  | 2.115158000  | -3.343149000 |
| H | 0.537239000  | 1.912662000  | 3.462598000  |

|   |              |              |              |
|---|--------------|--------------|--------------|
| H | -1.733862000 | 1.760654000  | 2.865946000  |
| O | -1.528203000 | 0.884429000  | 0.475233000  |
| C | -2.388220000 | 0.660570000  | -0.534922000 |
| C | -3.297131000 | 1.914608000  | -0.574442000 |
| C | -3.168649000 | -0.624750000 | -0.334429000 |
| C | -4.590253000 | 1.823616000  | 0.138931000  |
| C | -4.389125000 | -0.628861000 | 0.216469000  |
| H | -2.649731000 | -1.546360000 | -0.587448000 |
| C | -5.092284000 | 0.627664000  | 0.492408000  |
| H | -5.129252000 | 2.753109000  | 0.295131000  |
| H | -4.901081000 | -1.561355000 | 0.439302000  |
| H | -6.065725000 | 0.569739000  | 0.974598000  |
| O | -2.907103000 | 2.955165000  | -1.062088000 |
| H | 1.776937000  | -1.979452000 | 1.533137000  |
| O | -1.612598000 | 0.574575000  | -1.744134000 |
| O | -2.483126000 | 0.180628000  | -2.807510000 |
| H | -2.087911000 | -0.682357000 | -3.027499000 |

#### Intermediate F

|    |              |              |              |
|----|--------------|--------------|--------------|
| Mn | 0.576178000  | -0.319113000 | 0.031577000  |
| O  | -0.097924000 | 1.094198000  | -0.998448000 |
| C  | -1.174201000 | 4.910089000  | 0.232947000  |
| C  | -1.631738000 | 4.358479000  | -0.976180000 |
| H  | -2.279850000 | 4.944765000  | -1.620507000 |
| C  | -1.275209000 | 3.081523000  | -1.361740000 |
| H  | -1.627486000 | 2.653225000  | -2.293938000 |
| C  | -0.441977000 | 2.283322000  | -0.550376000 |
| C  | 0.020452000  | 2.837915000  | 0.675986000  |
| C  | 0.850396000  | 2.114948000  | 1.596332000  |
| H  | 1.138821000  | 2.657422000  | 2.503962000  |
| N  | 1.256682000  | 0.896701000  | 1.468703000  |
| C  | 1.963984000  | 0.263681000  | 2.585531000  |
| H  | 1.281175000  | 0.171345000  | 3.437413000  |
| H  | 2.815543000  | 0.873474000  | 2.908182000  |
| C  | 2.454604000  | -1.105501000 | 2.137069000  |
| H  | 2.800786000  | -1.696206000 | 2.996509000  |
| H  | 3.297489000  | -0.985256000 | 1.453268000  |
| N  | 1.384911000  | -1.828876000 | 1.4084870003 |

|   |              |              |              |
|---|--------------|--------------|--------------|
| C | 1.930647000  | -3.045125000 | 0.780652000  |
| H | 2.269812000  | -3.756628000 | 1.544832000  |
| H | 2.777420000  | -2.792363000 | 0.146447000  |
| C | 0.345844000  | -2.271173000 | 2.369888000  |
| H | -0.121862000 | -1.417659000 | 2.854559000  |
| H | 0.804467000  | -2.933503000 | 3.115542000  |
| C | -0.358541000 | 4.150705000  | 1.039474000  |
| H | 0.005833000  | 4.553223000  | 1.981516000  |
| O | -1.034133000 | -0.470360000 | 0.945136000  |
| C | -4.696775000 | -1.967812000 | -0.304282000 |
| C | -4.552710000 | -1.242778000 | 0.891247000  |
| H | -5.421247000 | -1.064682000 | 1.518134000  |
| C | -3.326765000 | -0.743906000 | 1.283248000  |
| H | -3.213312000 | -0.177526000 | 2.201395000  |
| C | -2.174104000 | -0.947887000 | 0.495373000  |
| C | -2.316027000 | -1.683358000 | -0.712482000 |
| C | -1.219477000 | -1.928511000 | -1.605350000 |
| H | -1.467799000 | -2.452213000 | -2.534992000 |
| N | 0.007173000  | -1.574220000 | -1.423243000 |
| C | 0.987397000  | -1.759030000 | -2.488508000 |
| H | 1.664574000  | -2.579030000 | -2.218070000 |
| H | 0.500328000  | -2.029235000 | -3.432117000 |
| C | 1.747947000  | -0.446576000 | -2.640329000 |
| H | 2.499783000  | -0.513541000 | -3.438300000 |
| H | 1.038433000  | 0.347579000  | -2.879960000 |
| N | 2.399399000  | -0.095894000 | -1.348840000 |
| C | 2.786090000  | 1.335032000  | -1.352881000 |
| H | 3.490779000  | 1.531891000  | -2.171248000 |
| H | 1.904773000  | 1.959310000  | -1.475275000 |
| C | 3.662277000  | -0.857329000 | -1.253577000 |
| H | 3.494506000  | -1.923083000 | -1.401271000 |
| H | 4.357869000  | -0.518039000 | -2.032215000 |
| C | -3.586212000 | -2.175861000 | -1.088934000 |
| H | -3.671630000 | -2.728926000 | -2.021261000 |
| H | -1.461381000 | 5.913663000  | 0.523594000  |
| H | -5.665297000 | -2.350690000 | -0.603336000 |
| H | -0.431595000 | -2.813248000 | 1.829065000  |
| H | 1.149061000  | -3.515715000 | 0.179296000  |

|   |             |              |              |
|---|-------------|--------------|--------------|
| H | 3.271359000 | 1.572252000  | -0.402630000 |
| H | 4.138091000 | -0.692541000 | -0.285908000 |

Intermediate G

|    |              |              |              |
|----|--------------|--------------|--------------|
| Mn | 0.158023000  | -0.481009000 | -0.517266000 |
| O  | 1.880949000  | -0.514826000 | -1.285168000 |
| C  | 5.583382000  | -0.900277000 | 0.535057000  |
| C  | 5.426703000  | -0.231306000 | -0.692591000 |
| H  | 6.299072000  | 0.180532000  | -1.191211000 |
| C  | 4.185881000  | -0.092860000 | -1.279654000 |
| H  | 4.061920000  | 0.412331000  | -2.231513000 |
| C  | 3.028057000  | -0.612481000 | -0.661356000 |
| C  | 3.180718000  | -1.274240000 | 0.586623000  |
| C  | 2.075196000  | -1.837285000 | 1.309522000  |
| H  | 2.358687000  | -2.458772000 | 2.168154000  |
| N  | 0.811946000  | -1.680087000 | 1.075837000  |
| C  | -0.124761000 | -2.343430000 | 1.984870000  |
| H  | 0.430998000  | -3.028561000 | 2.635363000  |
| H  | -0.834121000 | -2.931171000 | 1.393821000  |
| C  | -0.980296000 | -1.378583000 | 2.842746000  |
| H  | -1.038182000 | -1.728759000 | 3.878021000  |
| H  | -1.980137000 | -1.313909000 | 2.421814000  |
| N  | -0.426594000 | 0.013353000  | 2.892166000  |
| C  | -1.487700000 | 1.011576000  | 3.197568000  |
| H  | -1.920625000 | 0.790250000  | 4.175237000  |
| H  | -2.246483000 | 0.953445000  | 2.415509000  |
| C  | 0.713348000  | 0.129894000  | 3.837888000  |
| H  | 1.455447000  | -0.631858000 | 3.600449000  |
| H  | 0.342869000  | -0.007764000 | 4.855523000  |
| C  | 4.468719000  | -1.417938000 | 1.152721000  |
| H  | 4.564430000  | -1.943889000 | 2.100218000  |
| O  | 0.648832000  | 1.025168000  | 0.607612000  |
| C  | 0.926110000  | 5.050832000  | -0.408358000 |
| C  | 1.237699000  | 4.583684000  | 0.876624000  |
| H  | 1.579721000  | 5.281719000  | 1.634775000  |
| C  | 1.128926000  | 3.242983000  | 1.190201000  |
| H  | 1.406617000  | 2.880703000  | 2.175773000  |
| C  | 0.703100000  | 2.288464000  | 0.240601000  |

|   |              |              |              |
|---|--------------|--------------|--------------|
| C | 0.380667000  | 2.765279000  | -1.062024000 |
| C | -0.120363000 | 1.926002000  | -2.126308000 |
| H | -0.328067000 | 2.432632000  | -3.075388000 |
| N | -0.376998000 | 0.672208000  | -2.044751000 |
| C | -0.914700000 | -0.073136000 | -3.177134000 |
| H | -1.996250000 | -0.183897000 | -3.031256000 |
| H | -0.753470000 | 0.460166000  | -4.120619000 |
| C | -0.217823000 | -1.430789000 | -3.203536000 |
| H | -0.648120000 | -2.085025000 | -3.973840000 |
| H | 0.843995000  | -1.280018000 | -3.411565000 |
| N | -0.315715000 | -2.075280000 | -1.868336000 |
| C | 0.665227000  | -3.173342000 | -1.772525000 |
| H | 0.483061000  | -3.918811000 | -2.557562000 |
| H | 1.671646000  | -2.766416000 | -1.871348000 |
| C | -1.667880000 | -2.632705000 | -1.665191000 |
| H | -2.426149000 | -1.856543000 | -1.768174000 |
| H | -1.853467000 | -3.425249000 | -2.402352000 |
| C | 0.506245000  | 4.140740000  | -1.353388000 |
| H | 0.256846000  | 4.476958000  | -2.356945000 |
| H | 6.565078000  | -1.009148000 | 0.980821000  |
| H | 1.017011000  | 6.102699000  | -0.651603000 |
| H | 1.161809000  | 1.117197000  | 3.726309000  |
| H | -1.033756000 | 2.004498000  | 3.198197000  |
| H | 0.560099000  | -3.653640000 | -0.796866000 |
| H | -1.751971000 | -3.035252000 | -0.656177000 |
| O | -1.519786000 | -0.577529000 | 0.307932000  |

Intermediate H

|    |              |              |              |
|----|--------------|--------------|--------------|
| Mn | -0.217941000 | 0.418413000  | -0.400276000 |
| O  | 1.886590000  | 0.654682000  | -1.633172000 |
| C  | 4.887887000  | -2.123292000 | -0.882863000 |
| C  | 5.176875000  | -0.759754000 | -0.875944000 |
| H  | 6.192081000  | -0.416277000 | -0.707647000 |
| C  | 4.171962000  | 0.172924000  | -1.103855000 |
| H  | 4.397935000  | 1.236294000  | -1.113397000 |
| C  | 2.865107000  | -0.247898000 | -1.322108000 |
| C  | 2.536864000  | -1.611009000 | -1.270285000 |
| C  | 1.187197000  | -2.177447000 | -1.322523000 |
| H  | 1.175326000  | -3.235390000 | -1.625876000 |

|   |              |              |              |
|---|--------------|--------------|--------------|
| N | 0.074700000  | -1.629219000 | -0.995256000 |
| C | -1.106346000 | -2.492578000 | -1.005813000 |
| H | -0.915278000 | -3.398192000 | -1.600885000 |
| H | -1.958486000 | -1.955830000 | -1.430528000 |
| C | -1.569379000 | -2.862658000 | 0.397937000  |
| H | -2.432473000 | -3.524695000 | 0.323545000  |
| H | -1.851583000 | -1.961908000 | 0.941871000  |
| N | -0.485353000 | -3.571312000 | 1.195739000  |
| C | 0.200461000  | -2.632400000 | 2.144875000  |
| H | -0.548596000 | -2.286628000 | 2.858962000  |
| H | 0.608019000  | -1.771873000 | 1.603628000  |
| C | -1.031778000 | -4.756476000 | 1.918736000  |
| H | -1.449186000 | -5.456668000 | 1.194872000  |
| H | -1.815875000 | -4.404529000 | 2.590684000  |
| C | 3.579631000  | -2.533082000 | -1.086768000 |
| H | 3.342661000  | -3.594437000 | -1.086287000 |
| O | 1.137802000  | 0.098776000  | 1.021230000  |
| C | 4.048402000  | 2.666280000  | 2.506656000  |
| C | 4.085897000  | 1.277608000  | 2.734836000  |
| H | 4.901658000  | 0.851164000  | 3.311916000  |
| C | 3.106105000  | 0.447693000  | 2.237444000  |
| H | 3.141983000  | -0.625102000 | 2.403594000  |
| C | 2.013638000  | 0.942581000  | 1.474960000  |
| C | 1.987328000  | 2.356646000  | 1.236229000  |
| C | 0.958537000  | 3.018918000  | 0.470064000  |
| H | 1.025284000  | 4.113868000  | 0.428080000  |
| N | 0.019318000  | 2.436075000  | -0.189263000 |
| C | -0.892839000 | 3.188588000  | -1.036325000 |
| H | -1.895412000 | 3.152987000  | -0.591960000 |
| H | -0.598900000 | 4.241722000  | -1.132957000 |
| C | -0.881120000 | 2.500700000  | -2.401038000 |
| H | -1.561773000 | 2.997709000  | -3.106831000 |
| H | 0.133287000  | 2.556990000  | -2.812687000 |
| N | -1.233642000 | 1.065843000  | -2.264086000 |
| C | -0.760525000 | 0.325156000  | -3.445699000 |
| H | -1.176312000 | 0.751571000  | -4.369500000 |
| H | 0.330344000  | 0.354821000  | -3.488030000 |
| C | -2.702347000 | 0.929969000  | -2.186214000 |



|   |              |              |              |
|---|--------------|--------------|--------------|
| H | -3.102193000 | 1.561510000  | -1.390804000 |
| H | -3.158957000 | 1.226813000  | -3.140838000 |
| C | 3.006318000  | 3.180827000  | 1.771820000  |
| H | 2.949365000  | 4.251905000  | 1.588929000  |
| H | 5.673060000  | -2.854672000 | -0.730986000 |
| H | 4.818765000  | 3.314673000  | 2.906989000  |
| H | -0.232380000 | -5.228771000 | 2.490682000  |
| H | 0.989257000  | -3.182497000 | 2.661301000  |
| H | -1.087939000 | -0.715008000 | -3.367718000 |
| H | -2.972949000 | -0.102195000 | -1.954261000 |
| O | -1.940845000 | 0.044245000  | 0.685161000  |
| C | -3.169063000 | 0.377532000  | 0.862458000  |
| C | -4.228578000 | -0.519514000 | 0.346224000  |
| C | -3.542692000 | 1.579473000  | 1.519859000  |
| C | -5.596693000 | -0.123033000 | 0.571226000  |
| C | -4.868641000 | 1.903738000  | 1.690121000  |

#### Intermediate I

|    |              |              |              |
|----|--------------|--------------|--------------|
| Mn | 0.292233000  | -0.334942000 | -0.523674000 |
| O  | 2.598767000  | 0.029562000  | -0.879496000 |
| C  | 5.990700000  | -1.446943000 | 1.014405000  |
| C  | 6.112325000  | -0.692397000 | -0.150514000 |
| H  | 7.090043000  | -0.502311000 | -0.580565000 |
| C  | 4.979750000  | -0.185046000 | -0.777108000 |
| H  | 5.066729000  | 0.389237000  | -1.695616000 |
| C  | 3.718817000  | -0.423040000 | -0.240817000 |
| C  | 3.566876000  | -1.165248000 | 0.942819000  |
| C  | 2.311439000  | -1.401995000 | 1.664104000  |
| H  | 2.477698000  | -1.858670000 | 2.649128000  |
| N  | 1.108338000  | -1.129421000 | 1.324212000  |
| C  | 0.067211000  | -1.426083000 | 2.318288000  |
| H  | 0.501050000  | -1.846628000 | 3.237273000  |
| H  | -0.614470000 | -2.161612000 | 1.878378000  |
| C  | -0.841532000 | -0.237864000 | 2.583312000  |
| H  | -1.798934000 | -0.594671000 | 2.966597000  |
| H  | -1.025540000 | 0.290494000  | 1.653746000  |
| N  | -0.355759000 | 0.825369000  | 3.542317000  |
| C  | 1.073597000  | 1.212342000  | 3.348867000  |

|   |              |              |              |
|---|--------------|--------------|--------------|
| H | 1.203312000  | 1.432552000  | 2.284870000  |
| H | 1.710709000  | 0.383566000  | 3.657762000  |
| C | -1.252813000 | 2.016141000  | 3.372295000  |
| H | -2.292758000 | 1.687421000  | 3.412767000  |
| H | -1.049782000 | 2.426336000  | 2.380587000  |
| C | 4.730652000  | -1.667814000 | 1.548072000  |
| H | 4.630439000  | -2.240337000 | 2.466543000  |
| O | 0.354858000  | 1.497574000  | 0.304363000  |
| C | 0.030940000  | 5.263290000  | -1.446043000 |
| C | 0.336476000  | 5.095129000  | -0.085907000 |
| H | 0.491301000  | 5.967989000  | 0.542108000  |
| C | 0.448466000  | 3.836714000  | 0.467716000  |
| H | 0.702488000  | 3.721178000  | 1.517912000  |
| C | 0.253363000  | 2.652784000  | -0.292457000 |
| C | -0.027759000 | 2.834147000  | -1.684898000 |
| C | -0.193013000 | 1.746949000  | -2.616620000 |
| H | -0.429088000 | 2.040538000  | -3.647738000 |
| N | -0.070753000 | 0.493411000  | -2.352594000 |
| C | -0.275210000 | -0.506040000 | -3.393663000 |
| H | -1.308959000 | -0.869023000 | -3.330453000 |
| H | -0.124951000 | -0.090419000 | -4.398148000 |
| C | 0.704087000  | -1.645946000 | -3.139114000 |
| H | 0.579250000  | -2.446587000 | -3.883136000 |
| H | 1.724388000  | -1.255883000 | -3.225921000 |
| N | 0.549054000  | -2.179491000 | -1.766270000 |
| C | 1.722073000  | -2.999208000 | -1.428754000 |
| H | 1.816404000  | -3.852889000 | -2.115611000 |
| H | 2.630703000  | -2.397881000 | -1.490598000 |
| C | -0.643644000 | -3.047862000 | -1.692502000 |
| H | -1.539961000 | -2.490488000 | -1.958705000 |
| H | -0.518161000 | -3.913051000 | -2.359309000 |
| C | -0.140536000 | 4.137481000  | -2.218984000 |
| H | -0.368080000 | 4.239246000  | -3.278017000 |
| H | 6.869710000  | -1.850995000 | 1.502975000  |
| H | -0.062857000 | 6.253348000  | -1.876005000 |
| H | -1.031280000 | 2.743257000  | 4.154305000  |
| H | 1.280601000  | 2.087347000  | 3.967492000  |
| H | 1.611546000  | -3.380857000 | -0.410681000 |

|   |              |              |              |
|---|--------------|--------------|--------------|
| H | -0.773336000 | -3.387268000 | -0.663525000 |
| O | -1.633517000 | -0.967198000 | -0.069202000 |
| C | -2.897849000 | -0.636087000 | 0.030849000  |
| C | -3.676839000 | -1.649848000 | 0.925826000  |
| C | -3.567758000 | -0.310499000 | -1.279454000 |
| C | -4.991127000 | -2.119811000 | 0.472226000  |
| C | -4.752097000 | -0.828476000 | -1.620490000 |
| H | -3.016460000 | 0.372483000  | -1.922736000 |
| C | -5.476836000 | -1.733444000 | -0.720559000 |
| H | -5.519209000 | -2.808576000 | 1.123222000  |
| H | -5.209884000 | -0.590446000 | -2.575764000 |
| H | -6.441827000 | -2.105219000 | -1.053783000 |
| O | -3.142694000 | -2.074520000 | 1.933589000  |
| H | 2.787841000  | 0.815480000  | -1.417561000 |
| O | -2.975604000 | 0.715625000  | 0.787762000  |
| O | -3.872013000 | 0.748157000  | 1.728288000  |
| H | -0.467585000 | 0.476255000  | 4.498633000  |

#### Intermediate J

|    |              |              |              |
|----|--------------|--------------|--------------|
| Mn | -0.073107000 | 0.185158000  | -0.875968000 |
| O  | 1.745081000  | 0.843487000  | -1.768511000 |
| C  | 5.411550000  | -0.321733000 | -0.176895000 |
| C  | 5.209538000  | 0.999821000  | -0.564155000 |
| H  | 6.007086000  | 1.728384000  | -0.467545000 |
| C  | 3.981332000  | 1.397301000  | -1.087472000 |
| H  | 3.823985000  | 2.424926000  | -1.405761000 |
| C  | 2.961799000  | 0.468061000  | -1.204561000 |
| C  | 3.125898000  | -0.860930000 | -0.810006000 |
| C  | 2.079360000  | -1.884915000 | -0.861706000 |
| H  | 2.444760000  | -2.910610000 | -0.798036000 |
| N  | 0.816857000  | -1.686177000 | -0.947381000 |
| C  | -0.012979000 | -2.875236000 | -0.761992000 |
| H  | 0.447025000  | -3.732157000 | -1.269795000 |
| H  | -1.004327000 | -2.696502000 | -1.179765000 |
| C  | -0.143363000 | -3.147795000 | 0.749050000  |
| H  | -0.826052000 | -4.000068000 | 0.888211000  |
| H  | -0.619939000 | -2.278467000 | 1.204989000  |
| N  | 1.157800000  | -3.370901000 | 1.351134000  |

|   |             |              |              |
|---|-------------|--------------|--------------|
| C | 1.311720000 | -2.681490000 | 2.623024000  |
| H | 1.090283000 | -1.620424000 | 2.475795000  |
| H | 2.344499000 | -2.784395000 | 2.971565000  |
| C | 1.507609000 | -4.778102000 | 1.434784000  |
| H | 1.418610000 | -5.245989000 | 0.447913000  |
| H | 0.861498000 | -5.334971000 | 2.134568000  |
| C | 4.377488000 | -1.239170000 | -0.310321000 |
| H | 4.519739000 | -2.271423000 | -0.002640000 |
| O | 0.792669000 | 0.495421000  | 0.768665000  |
| C | 1.072333000 | 3.944612000  | 3.062371000  |
